# Supplementary material for: Lipase immobilization towards improved productivity on kinetic resolutions by a continuous-flow process
Source: Royal Society of Chemistry journal article supplement (doi:10.1039/c5ra17961k), 2015-01-01
Supplement: c5ra17961k1.pdf [file c5ra17961k1.pdf]

# Lipase Immobilization Towards Improved Productivity on Kinetic Resolutions by Continuous-Flow Process

Marcus V.M. Silva,<sup>a</sup> Jonathan Bassut,<sup>a</sup> Ivaldo I. Junior,<sup>b</sup> Stefania P.  
de Souza,<sup>a</sup> Melissa L. G. Estrada,<sup>b,c</sup> Leandro S. M. Miranda<sup>a</sup>,  
Rodrigo O. M. A. de Souza<sup>a\*</sup>

a- Biocatalysis and Organic Synthesis Group, Federal University of Rio de Janeiro,  
Chemistry Institute, Rio de Janeiro, Brazil.

b- School of Chemistry, Federal University of Rio de Janeiro, Rio de Janeiro, Brazil. c-  
Campus Xerém, Federal University of Rio de Janeiro, Rio de Janeiro, Brazil

## Supporting Information

## 1.1. Analysis of statistic data

### 1.1.1. Ethyl Acetate as Acyl donor.

**Table S1 – 2<sup>3-1</sup> Fractional factorial experimental design with coded values for the reaction catalyzed by Novozyme 435 using ethyl acetate as acyl donor.**

| Assay | Temperature (°C) | [E] (%) | Acylating agent/alcohol (mol/mol) | Conversion (%) | ee (%) |
|-------|------------------|---------|-----------------------------------|----------------|--------|
| 1     | 50(-1)           | 5(-1)   | 3/1(+1)                           | 32             | 24     |
| 2     | 70(+1)           | 5(-1)   | 1/1(-1)                           | 28             | 19     |
| 3     | 50(-1)           | 15(+1)  | 1/1(-1)                           | 30             | 26     |
| 4     | 70(+1)           | 15(+1)  | 3/1(+1)                           | 46             | 42     |
| 5     | 60(0)            | 10(0)   | 2/1(0)                            | 32             | 24     |
| 6     | 60(0)            | 10(0)   | 2/1(0)                            | 29             | 19     |
| 7     | 60(0)            | 10(0)   | 2/1(0)                            | 31             | 17     |

**Table S2. Estimated effect for independent variables; R<sup>2</sup>=0,9764.**

| Factor   | Effect   | p         |
|----------|----------|-----------|
| Mean     | 33,75000 | 0,000512* |
| Curvatr. | -6,16667 | 0,118298  |
| T        | 5,50000  | 0,069222  |
| E        | 7,50000  | 0,039067* |
| R        | 9,50000  | 0,024893* |

\*95% statistically significant

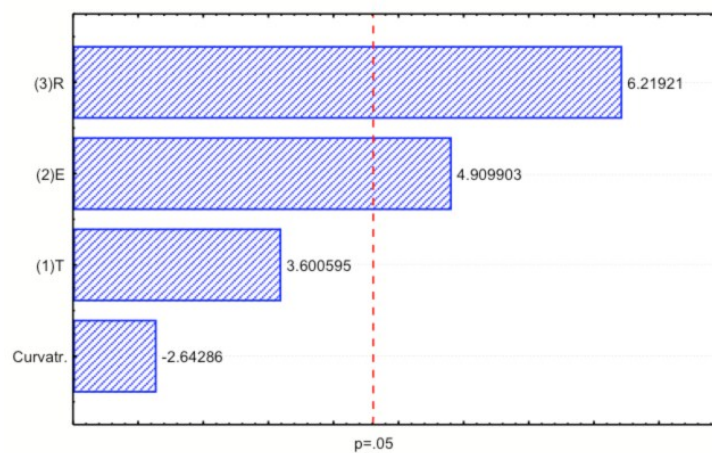

**Figure S1. Pareto chart**

**Table S3 – 2<sup>3-1</sup> Fractional factorial experimental design with coded values for the reaction catalyzed by Amano AK Lipase using ethyl acetate as acyl donor.**

| Assay | Temperature (°C) | [E] (%) | Acylating agent/alcohol (mol/mol) | Conversion (%) | ee (%) |
|-------|------------------|---------|-----------------------------------|----------------|--------|
| 8     | 50(-1)           | 5(-1)   | 3/1(+1)                           | 7              | >1     |
| 9     | 70(+1)           | 5(-1)   | 1/1(-1)                           | 56             | 34     |
| 10    | 50(-1)           | 15(+1)  | 1/1(-1)                           | 7              | >1     |
| 11    | 70(+1)           | 15(+1)  | 3/1(+1)                           | 7              | >1     |
| 12    | 60(0)            | 10(0)   | 2/1(0)                            | 8              | 3      |
| 13    | 60(0)            | 10(0)   | 2/1(0)                            | 9              | >1     |
| 14    | 60(0)            | 10(0)   | 2/1(0)                            | 8              | >1     |

**Table S4. Estimated effect for independent variables; R<sup>2</sup>=0.99967.**

| Factor   | Effect   | p         |
|----------|----------|-----------|
| Mean     | 19,5000  | 0,000219* |
| Curvatr. | -22,3333 | 0,001556* |
| T        | 25,0000  | 0,000533* |
| E        | -24,0000 | 0,000578* |
| R        | -24,0000 | 0,000578* |

\*95% statistically significant

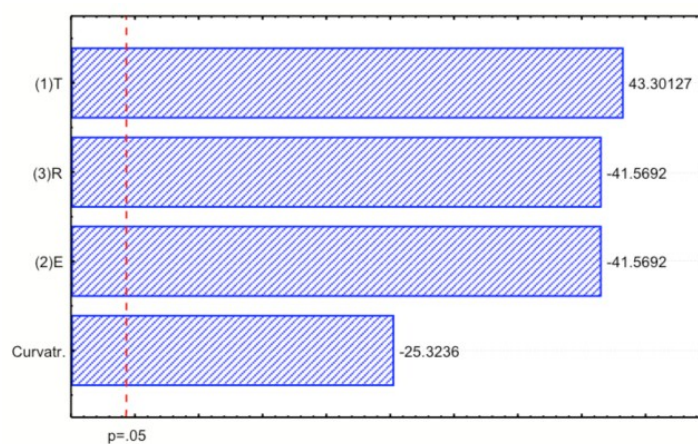

**Figure S2. Pareto chart**

**Table S5 – 2<sup>3-1</sup> Fractional factorial experimental design with coded values for the reaction catalyzed by PS-C “Amano” I Lipase using ethyl acetate as acyl donor.**

| Assay | Temperature (°C) | [E] (%) | Acylating agent/alcohol (mol/mol) | Conversion (%) | ee (%) |
|-------|------------------|---------|-----------------------------------|----------------|--------|
| 15    | 50(-1)           | 5(-1)   | 3/1(+1)                           | 6              | >1     |
| 16    | 70(+1)           | 5(-1)   | 1/1(-1)                           | 4              | >1     |
| 17    | 50(-1)           | 15(+1)  | 1/1(-1)                           | 10             | >1     |
| 18    | 70(+1)           | 15(+1)  | 3/1(+1)                           | 19             | 12     |
| 19    | 60(0)            | 10(0)   | 2/1(0)                            | 14             | 3      |
| 20    | 60(0)            | 10(0)   | 2/1(0)                            | 14             | 4      |
| 21    | 60(0)            | 10(0)   | 2/1(0)                            | 16             | 2      |

**Table S6. Estimated effect for independent variables; R<sup>2</sup>=0.99536.**

| Factor   | Effect   | p         |
|----------|----------|-----------|
| Mean     | 9,25000  | 0,000973* |
| Curvatr. | 10,16667 | 0,007441* |
| T        | 2,50000  | 0,049414* |
| E        | 8,50000  | 0,004582* |
| R        | 4,50000  | 0,016065* |

\*95% statistically significant

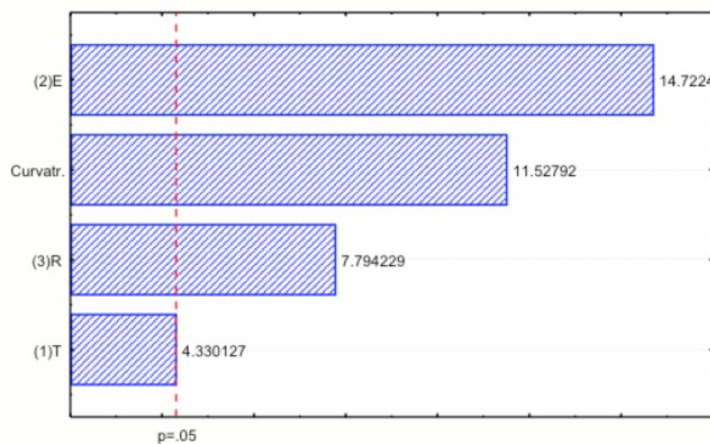

**Figure S3. Pareto chart**

### 1.1.2. Isopropenyl Acetate as Acyl donor.

**Table S7 – 2<sup>3-1</sup> Fractional factorial experimental design with coded values for the reaction catalyzed by Novozyme 435 using isopropenyl acetate as acyl donor.**

| Assay | Temperature (°C) | [E] (%) | Acylating agent/alcohol (mol/mol) | Conversion (%) | ee (%) |
|-------|------------------|---------|-----------------------------------|----------------|--------|
| 22    | 50(-1)           | 5(-1)   | 3/1(+1)                           | 38             | 43     |
| 23    | 70(+1)           | 5(-1)   | 1/1(-1)                           | 49             | 54     |
| 24    | 50(-1)           | 15(+1)  | 1/1(-1)                           | 50             | 94     |
| 25    | 70(+1)           | 15(+1)  | 3/1(+1)                           | 44             | 78     |
| 26    | 60(0)            | 10(0)   | 2/1(0)                            | 52             | 66     |
| 27    | 60(0)            | 10(0)   | 2/1(0)                            | 52             | 42     |
| 28    | 60(0)            | 10(0)   | 2/1(0)                            | 53             | 63     |

**Table S8. Estimated effect for independent variables; R<sup>2</sup>=0,99624.**

| Factor   | Effect   | p         |
|----------|----------|-----------|
| Mean     | 45,2500  | 0,000041* |
| Curvatr. | 14,16667 | 0,003853* |
| T        | 2,5000   | 0,049414* |
| E        | 3,5000   | 0,026148* |
| R        | -8,5000  | 0,004582* |

\*95% statistically significant

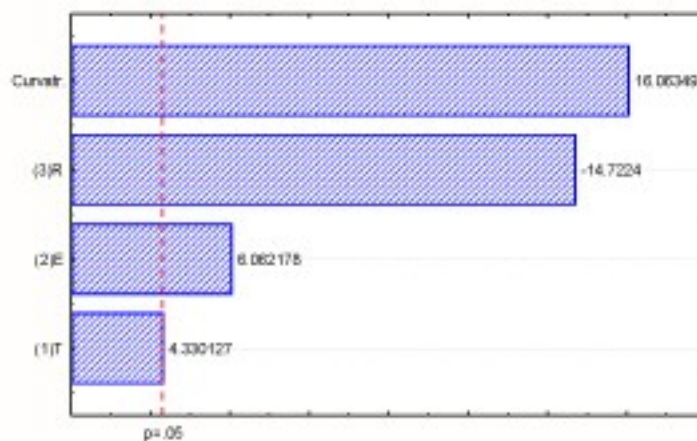

**Figure S4. Pareto chart**

**Table S9 – 2<sup>3-1</sup> Fractional factorial experimental design with coded values for the reaction catalyzed by Amano AK Lipase using isopropenyl acetate as acyl donor.**

| Assay | Temperature (°C) | [E] (%) | Acylating agent/alcohol (mol/mol) | Conversion (%) | ee (%) |
|-------|------------------|---------|-----------------------------------|----------------|--------|
| 29    | 50(-1)           | 5(-1)   | 3/1(+1)                           | 9              | >1     |
| 30    | 70(+1)           | 5(-1)   | 1/1(-1)                           | 9              | >1     |
| 31    | 50(-1)           | 15(+1)  | 1/1(-1)                           | 15             | 6      |
| 32    | 70(+1)           | 15(+1)  | 3/1(+1)                           | 25             | 22     |
| 33    | 60(0)            | 10(0)   | 2/1(0)                            | 11             | 7      |
| 34    | 60(0)            | 10(0)   | 2/1(0)                            | 14             | 10     |
| 35    | 60(0)            | 10(0)   | 2/1(0)                            | 11             | 3      |

**Table S10. Estimated effect for independent variables; R<sup>2</sup>=0,96804.**

| Factor   | Effect   | p         |
|----------|----------|-----------|
| Mean     | 14,50000 | 0,003548* |
| Curvatr. | -5,00000 | 0,199359  |
| T        | 5,00000  | 0,101973  |
| E        | 11,00000 | 0,023908* |
| R        | 5,00000  | 0,101973  |

\*95% statistically significant

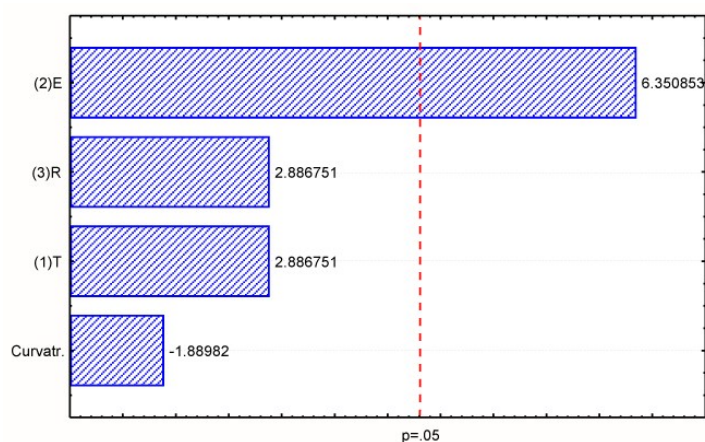

**Figure S5. Pareto chart**

**Table S11 – 2<sup>3-1</sup> Fractional factorial experimental design with coded values for the reaction catalyzed by Lipase PS-C “Amano” I Lipase using isopropenyl acetate as acyl donor.**

| Assay | Temperature (°C) | [E] (%) | Acylating agent/alcohol (mol/mol) | Conversion (%) | ee (%) |
|-------|------------------|---------|-----------------------------------|----------------|--------|
| 36    | 50(-1)           | 5(-1)   | 3/1(+1)                           | 18             | 8      |
| 37    | 70(+1)           | 5(-1)   | 1/1(-1)                           | 52             | 46     |
| 38    | 50(-1)           | 15(+1)  | 1/1(-1)                           | 29             | 21     |
| 39    | 70(+1)           | 15(+1)  | 3/1(+1)                           | 32             | 10     |
| 40    | 60(0)            | 10(0)   | 2/1(0)                            | 41             | 32     |
| 41    | 60(0)            | 10(0)   | 2/1(0)                            | 44             | 40     |
| 42    | 60(0)            | 10(0)   | 2/1(0)                            | 43             | 23     |

**Table S12. Estimated effect for independent variables; R<sup>2</sup>=0,96804.**

| Factor   | Effect   | p         |
|----------|----------|-----------|
| Mean     | 32,7500  | 0,000543* |
| Curvatr. | 19,8333  | 0,013560* |
| T        | 18,5000  | 0,006749* |
| E        | -4,5000  | 0,098496  |
| R        | -15,5000 | 0,009573* |

\*95% statistically significant

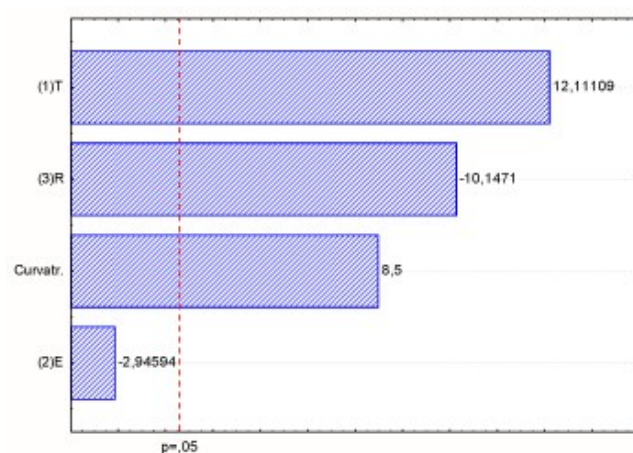

**Figure S6. Pareto chart**

### 1.1.3. Vinyl Acetate as Acyl donor.

**Table S13 – 2<sup>3-1</sup> Fractional factorial experimental design with coded values for the reaction catalyzed by Novozyme 435 using vinyl acetate as acyl donor.**

| Assay | Temperature (°C) | [E] (%) | Acylating agent/alcohol (mol/mol) | Conversion (%) | ee (%) |
|-------|------------------|---------|-----------------------------------|----------------|--------|
| 43    | 50(-1)           | 5(-1)   | 3/1(+1)                           | 45             | 80     |
| 44    | 70(+1)           | 5(-1)   | 1/1(-1)                           | 57             | 41     |
| 45    | 50(-1)           | 15(+1)  | 1/1(-1)                           | 51             | 96     |
| 46    | 70(+1)           | 15(+1)  | 3/1(+1)                           | 44             | 93     |
| 47    | 60(0)            | 10(0)   | 2/1(0)                            | 51             | 70     |
| 48    | 60(0)            | 10(0)   | 2/1(0)                            | 51             | 78     |
| 49    | 60(0)            | 10(0)   | 2/1(0)                            | 52             | 78     |

**Table S14. Estimated effect for independent variables; R<sup>2</sup>=0,9943.**

| Factor   | Effect   | p         |
|----------|----------|-----------|
| Mean     | 49,25000 | 0,000034* |
| Curvatr. | 4,16667  | 0,041998* |
| T        | 2,50000  | 0,049414* |
| E        | -3,50000 | 0,026148* |
| R        | -9,50000 | 0,003673* |

\*95% statistically significant

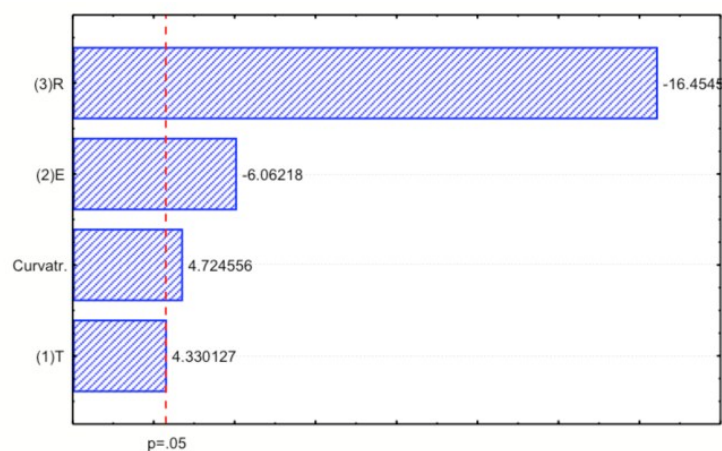

**Figure S7. Pareto chart**



**Table S15 – 2<sup>3-1</sup> Fractional factorial experimental design with coded values for the reaction catalyzed by Amano AK Lipase using vinyl acetate as acyl donor.**

| Assay | Temperature (°C) | [E] (%) | Acylating agent/alcohol (mol/mol) | Conversion (%) | ee (%) |
|-------|------------------|---------|-----------------------------------|----------------|--------|
| 50    | 50(-1)           | 5(-1)   | 3/1(+1)                           | 48             | 93     |
| 51    | 70(+1)           | 5(-1)   | 1/1(-1)                           | 47             | 39     |
| 52    | 50(-1)           | 15(+1)  | 1/1(-1)                           | 49             | 96     |
| 53    | 70(+1)           | 15(+1)  | 3/1(+1)                           | 59             | 87     |
| 54    | 60(0)            | 10(0)   | 2/1(0)                            | 54             | 66     |
| 55    | 60(0)            | 10(0)   | 2/1(0)                            | 52             | 59     |
| 56    | 60(0)            | 10(0)   | 2/1(0)                            | 51             | 63     |

**Table S16. Estimated effect for independent variables; R<sup>2</sup>=0,97947.**

| Factor   | Effect   | p         |
|----------|----------|-----------|
| Mean     | 50,75000 | 0,000097* |
| Curvatr. | 2,50000  | 0,243350  |
| T        | 4,50000  | 0,046002* |
| E        | 6,50000  | 0,022860* |
| R        | 5,50000  | 0,031504* |

\*95% statistically significant

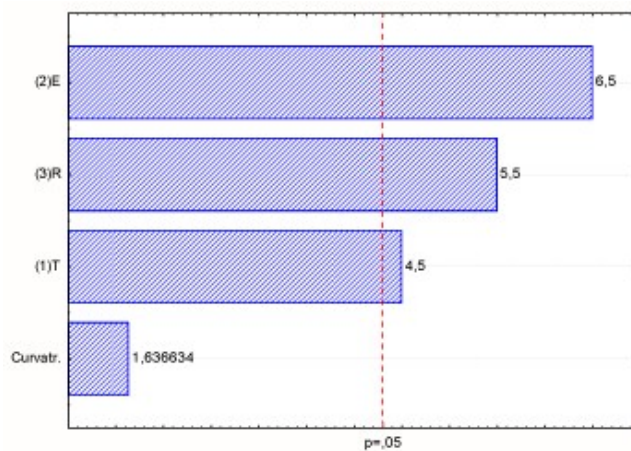

**Figure S8. Pareto chart**

**Table S17 – 2<sup>3-1</sup> Fractional factorial experimental design with coded values for the reaction catalyzed by Lipase PS-C “Amano” I Lipase using vinyl acetate as acyl donor.**

| Assay | Temperature (°C) | [E] (%) | Acylating agent/alcohol (mol/mol) | Conversion (%) | ee (%) |
|-------|------------------|---------|-----------------------------------|----------------|--------|
| 57    | 50(-1)           | 5(-1)   | 3/1(+1)                           | 35             | 40     |
| 58    | 70(+1)           | 5(-1)   | 1/1(-1)                           | 42             | 34     |
| 59    | 50(-1)           | 15(+1)  | 1/1(-1)                           | 43             | 66     |
| 60    | 70(+1)           | 15(+1)  | 3/1(+1)                           | 64             | 88     |
| 61    | 60(0)            | 10(0)   | 2/1(0)                            | 37             | 45     |
| 62    | 60(0)            | 10(0)   | 2/1(0)                            | 37             | 45     |
| 63    | 60(0)            | 10(0)   | 2/1(0)                            | 38             | 46     |

**Table S18. Estimated effect for independent variables; R<sup>2</sup>=0,99889.**

| Factor   | Effect   | p         |
|----------|----------|-----------|
| Mean     | 45,7500  | 0,000040* |
| Curvatr. | -16,8333 | 0,002734* |
| T        | 13,5000  | 0,001824* |
| E        | 15,5000  | 0,001385* |
| R        | 7,5000   | 0,005874* |

\*95% statistically significant

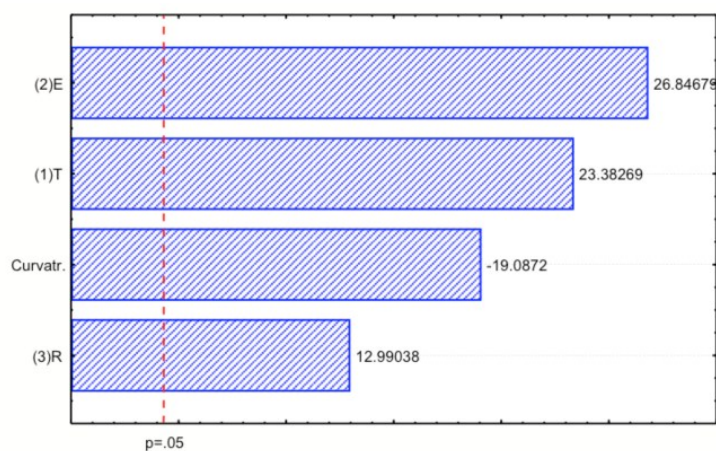

**Figure S9. Pareto chart**

## 1.2. GC-FID Analysis

### 1.2.1. Chromatograms

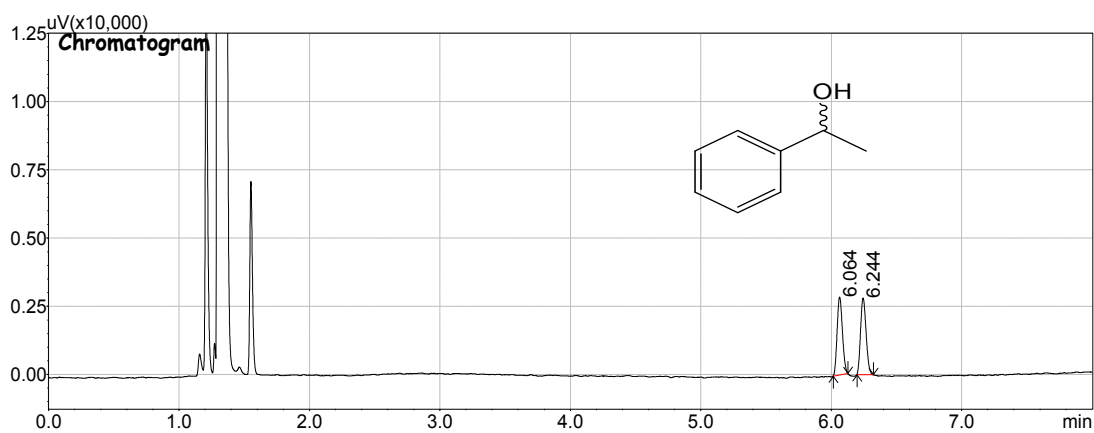

Figure S10. GC-FID of (*RS*)-1-Phenylethanol. Experimental conditions: *rac*-1-Phenylethanol (1mmol, 122mg), in cyclohexane (3 mL).

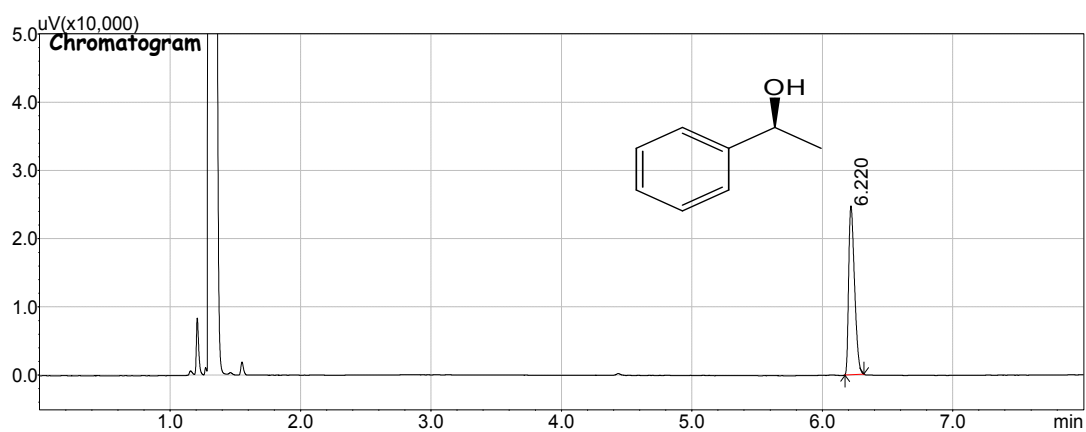

Figure S11. GC-FID of (*S*)-1-Phenylethanol. Experimental conditions: *rac*-1-Phenylethanol (1mmol, 122mg), in cyclohexane (3 mL).

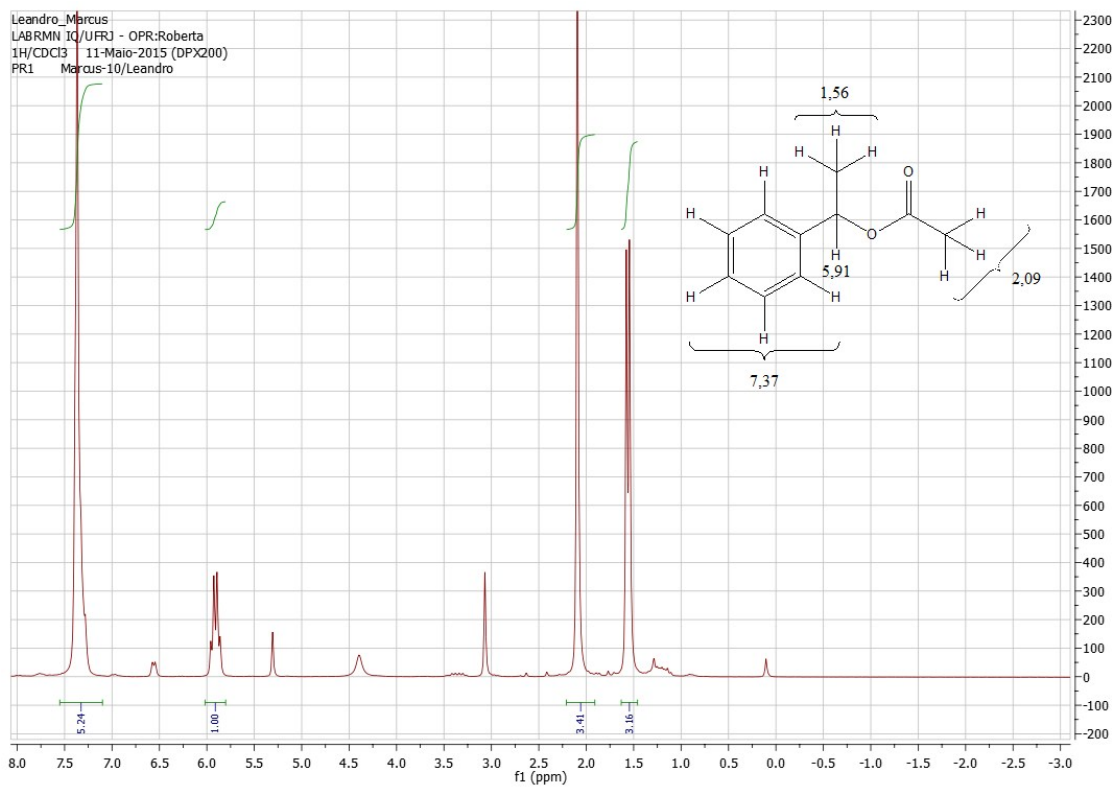

Figure S12:  $^1\text{H}$  RMN spectra of product of chemistry acetylation of (*RS*)-1-Phenylethanol

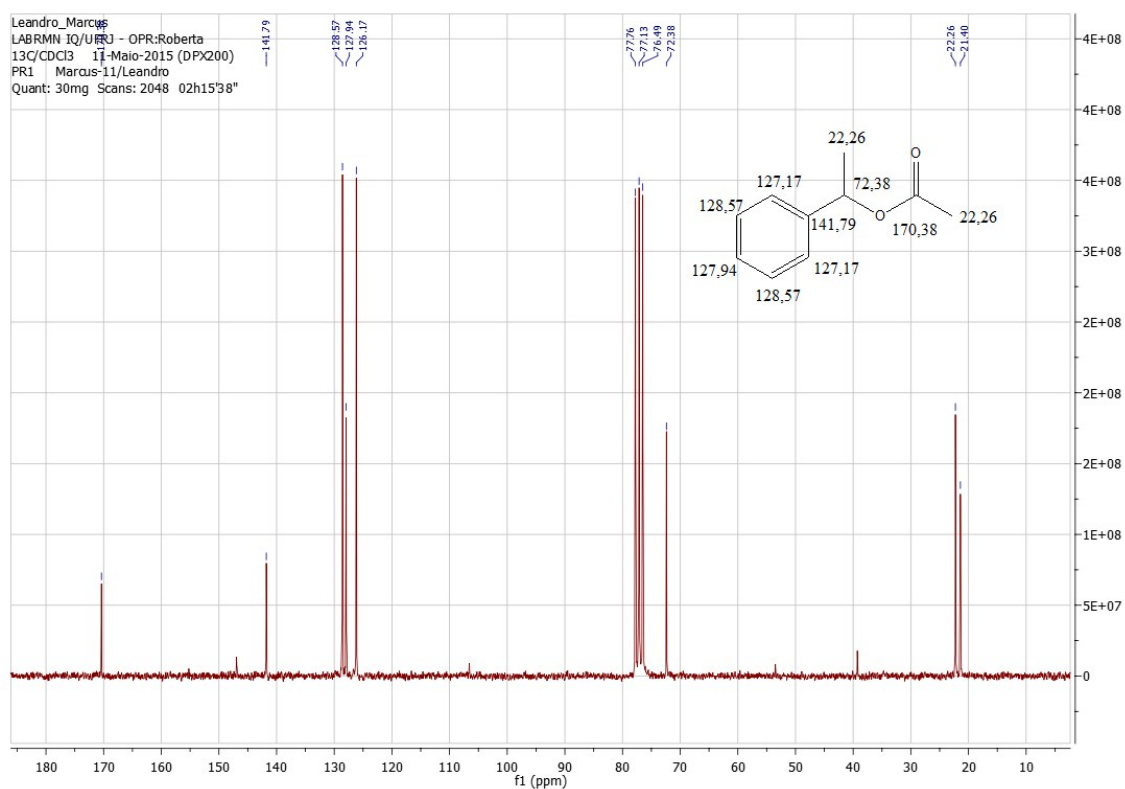

Figure S13:  $^{13}\text{C}$  RMN spectra of product of chemistry acetylation of (*RS*)-1-Phenylethanol

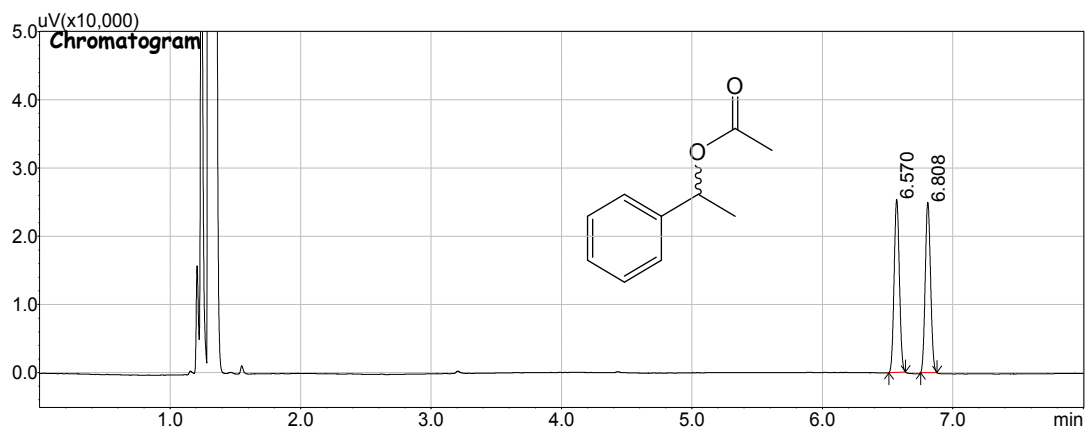

Figure S14. GC-FID of (*RS*)-1-Phenylethyl acetate.

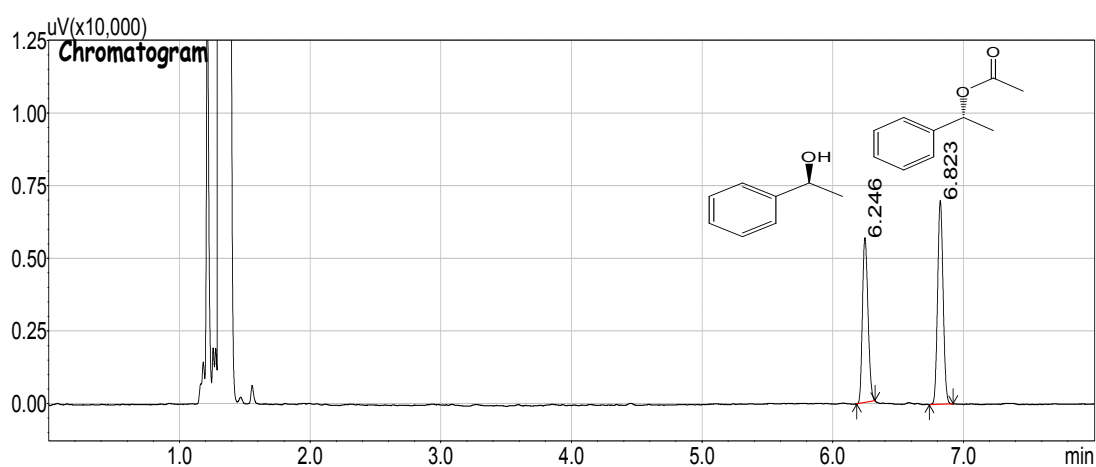

Figure S15. GC-FID of enzymatic acetylation of (*RS*)-1-Phenylethanol with Novozymes 435 for 24 hours. Experimental conditions: *rac*-1-Phenylethanol (1mmol, 122mg) 15% (w/w) of biocatalist, in cyclohexane (3 mL).

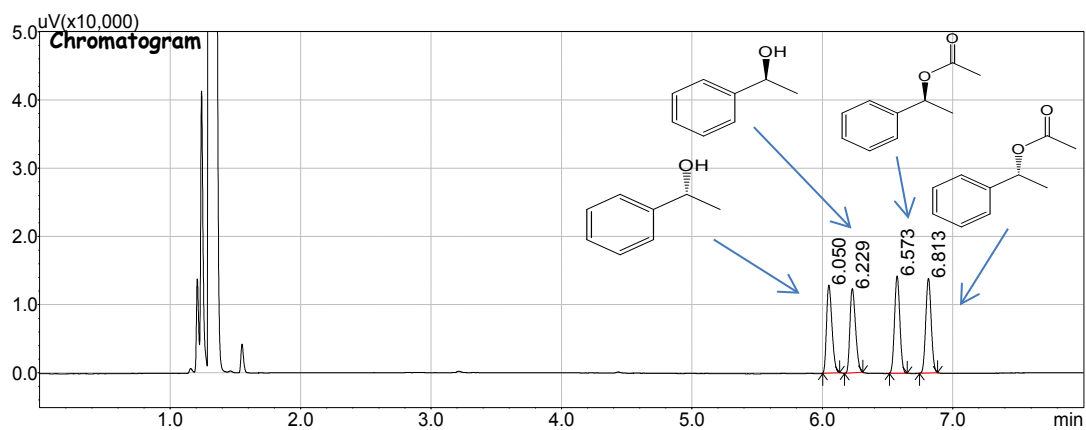

Figure S16: GC-FID of (*RS*)-1-Phenylethyl acetate and (*RS*)-1-Phenylethanol

## 2. Kinetic Resolution Experiments

### 2.1 – Chromatograms of Kinetic Resolution in continuous flow reactor

All reactions were conducted at 50°C, with 0.33M of 1-phenylethanol and 0.33M of vinyl acetate.

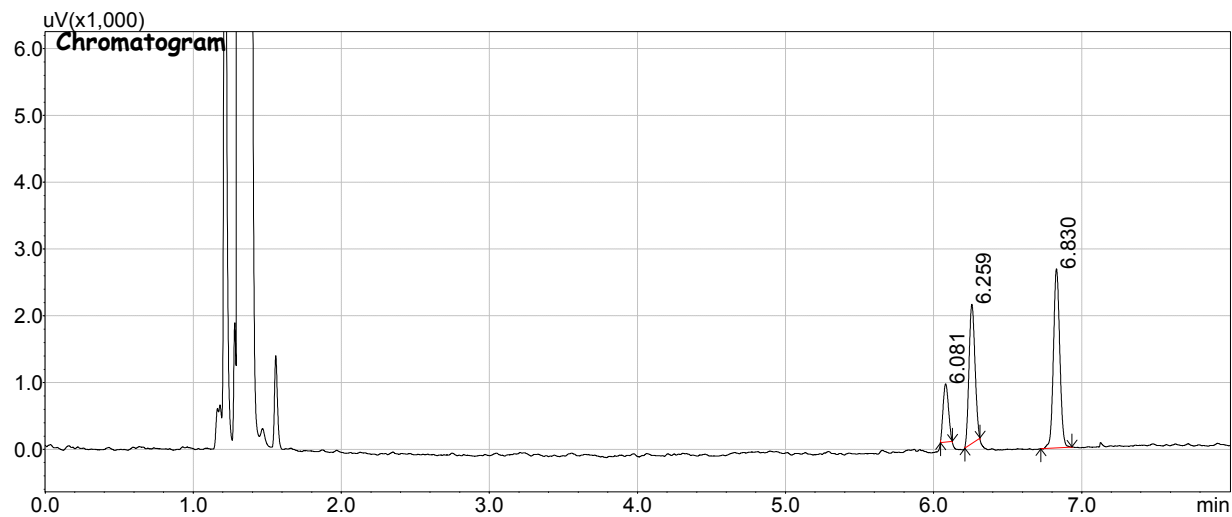

Figure S17: Novozymes 435 with 7 minutes of residence time.

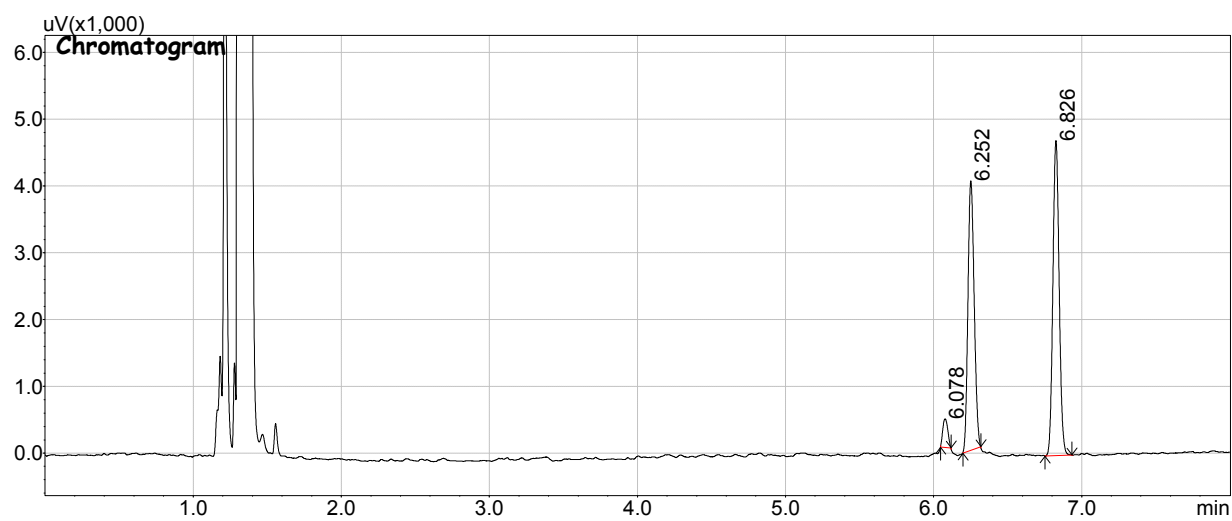

Figure S18: Novozymes 435 with 15 minutes of residence time.

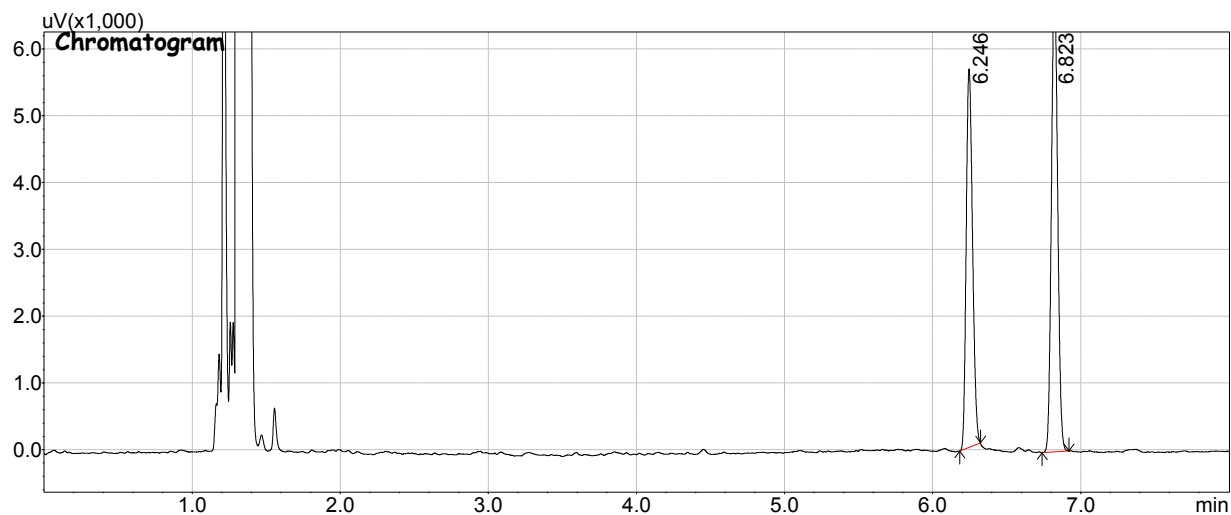

Figure S19: Novozymes 435 with 20 minutes of residence time.

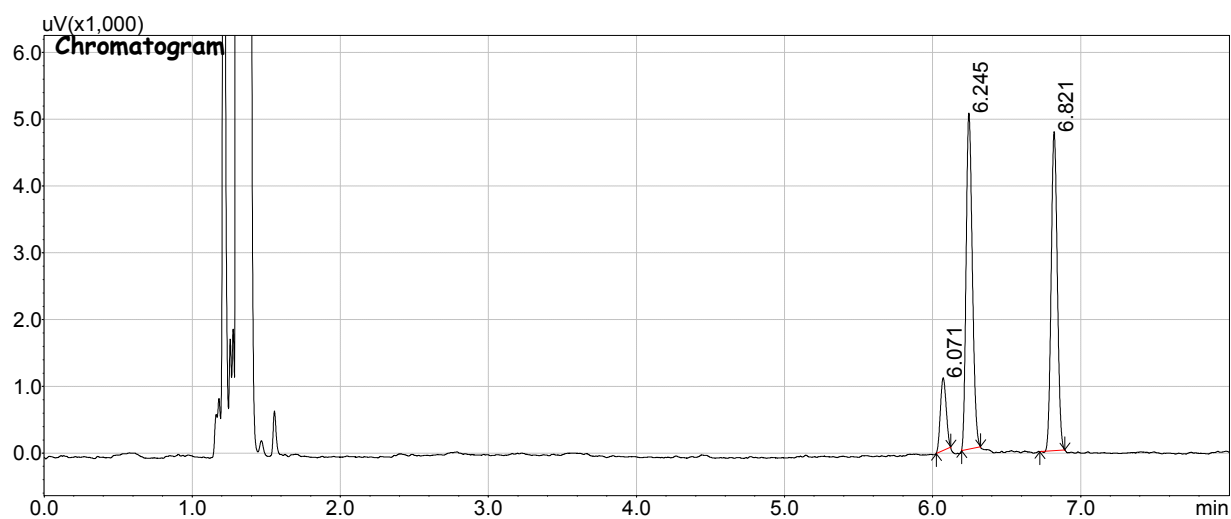

Figure S20: Accurel MP-1000 with 7 minutes of residence time.

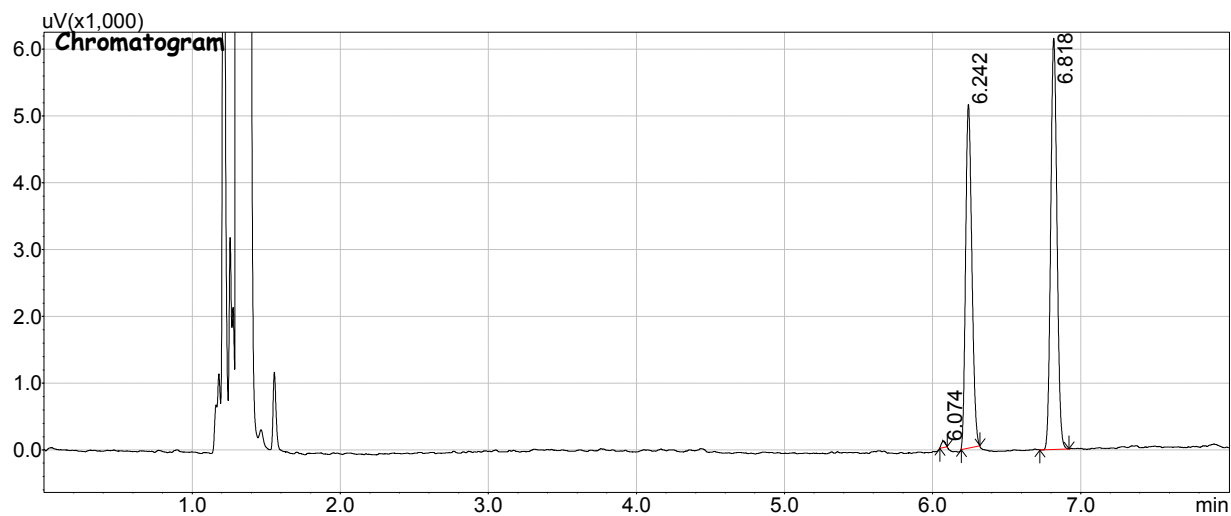

Figure S21: Accurel MP-1000 with 15 minutes of residence time.

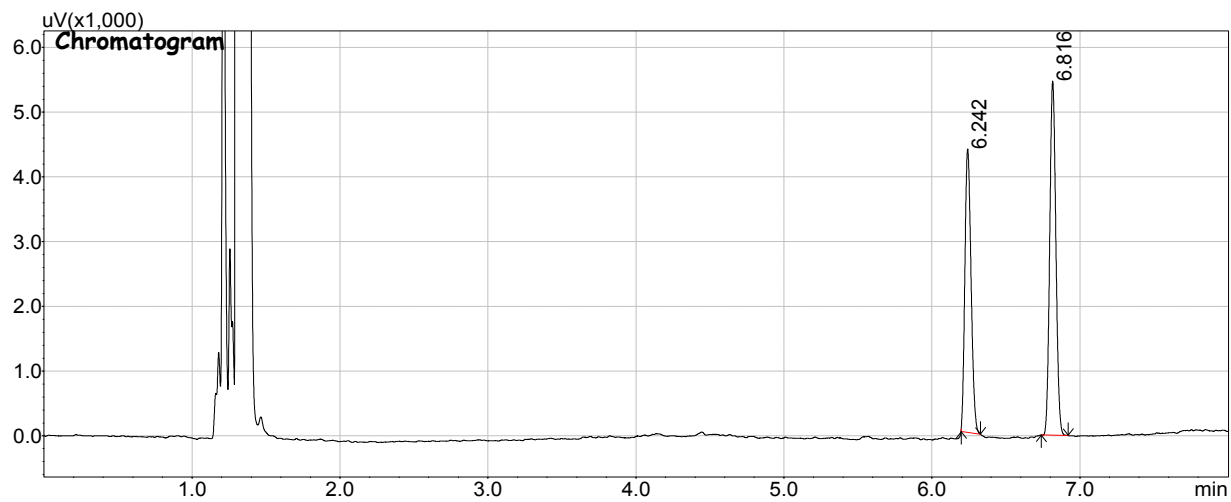

Figure S22: Accurel MP-1000 with 20 minutes of residence time.

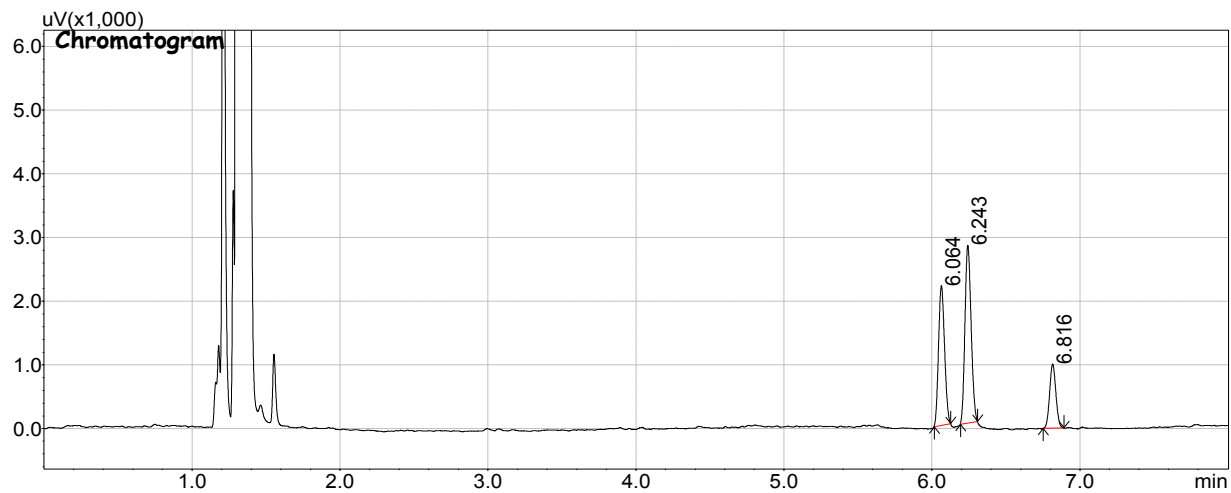

Figure S23: IB-S861 with 7 minutes of residence time.

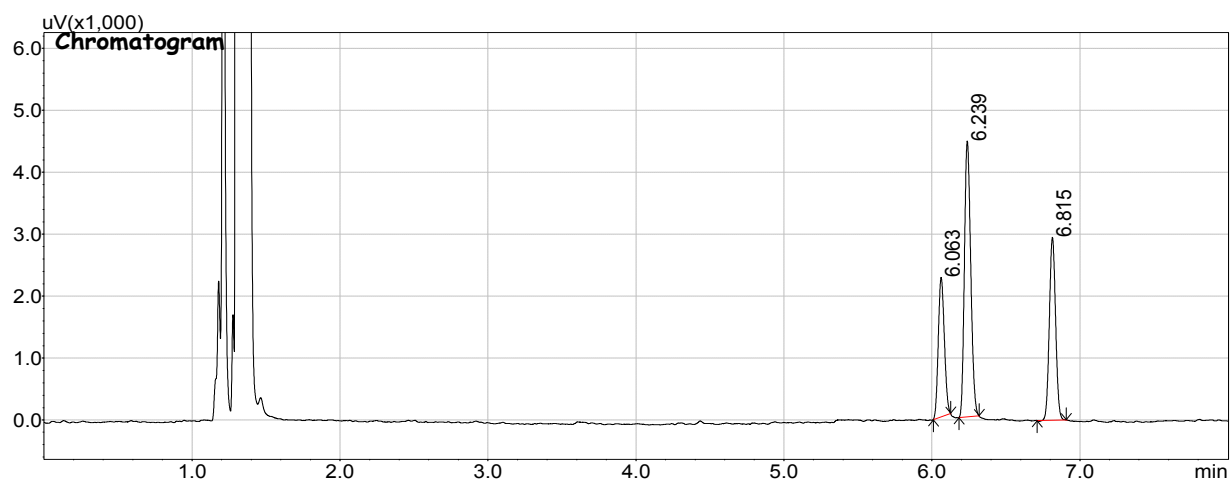

Figure S24: IB-S861 with 15 minutes of residence time.



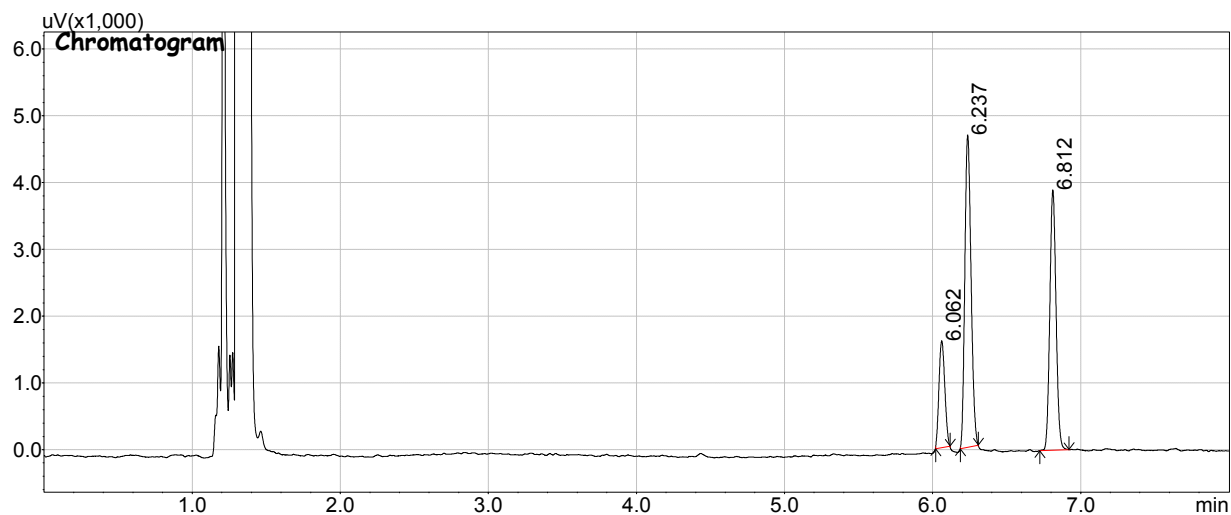

Figure S25: IB-S861 with 20 minutes of residence time

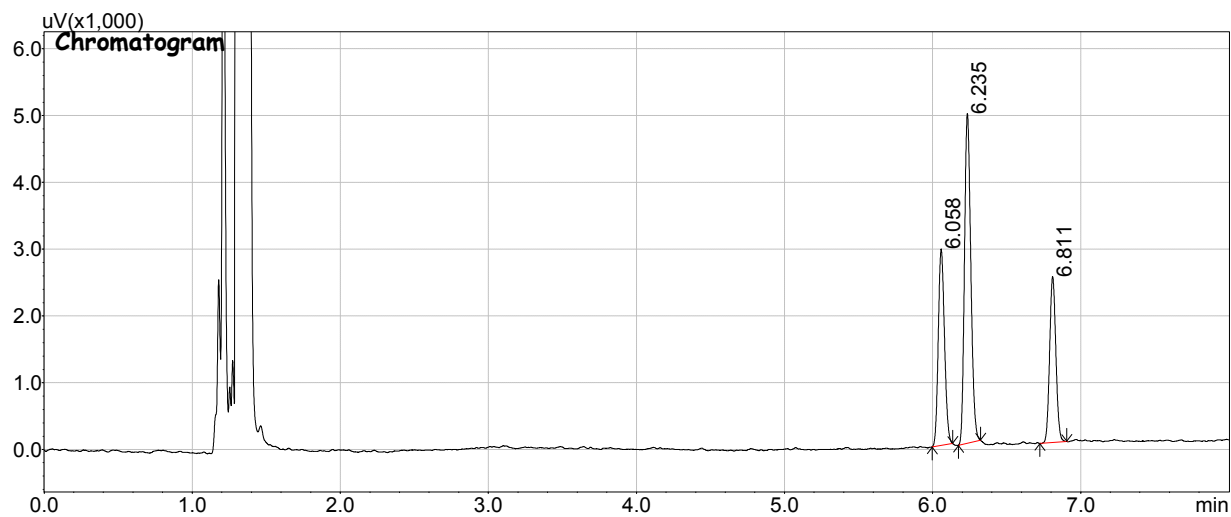

Figure S26: IB-EC1 with 7 minutes of residence time

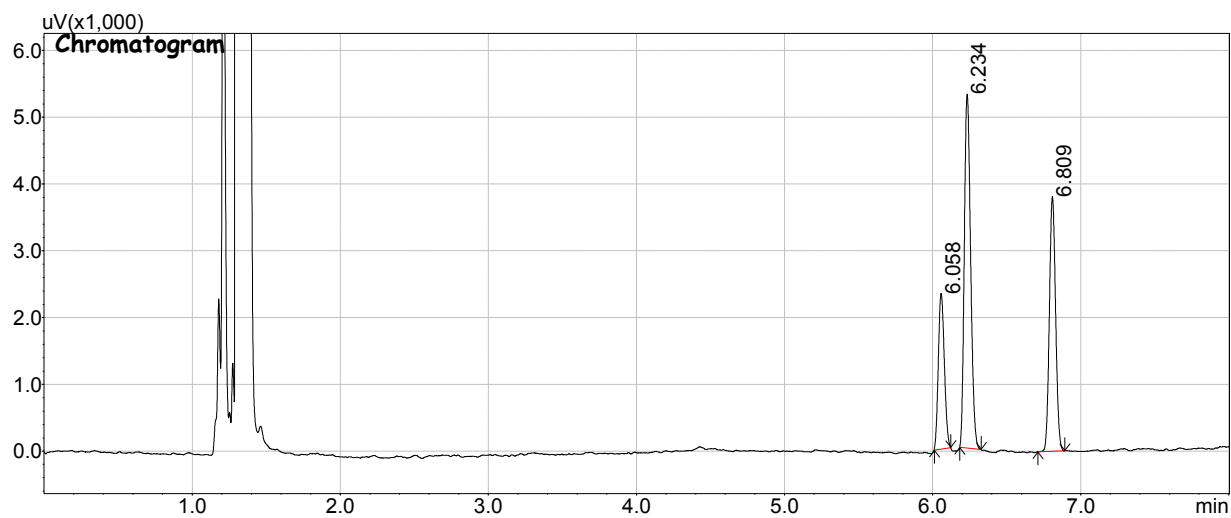

Figure S27: IB-EC1 with 15 minutes of residence time

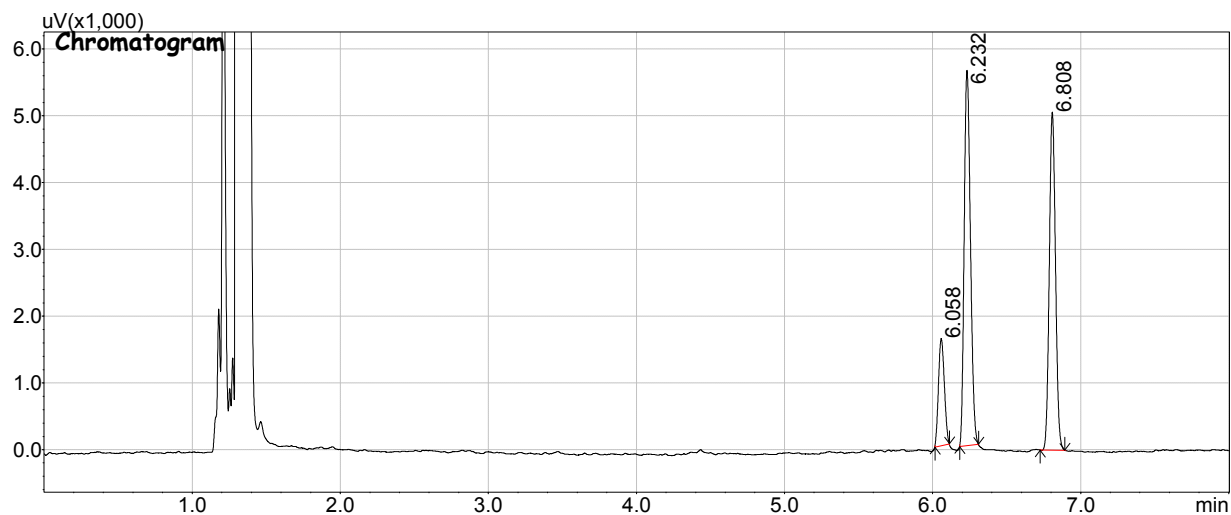

Figure S28: IB-EC1 with 20 minutes of residence time

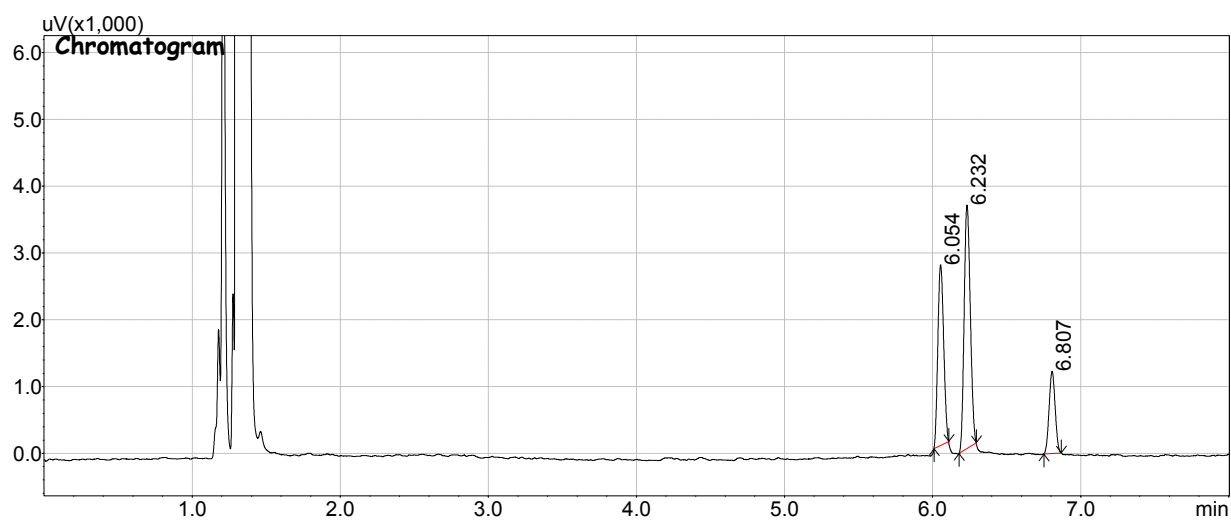

Figure S29: ECR1091F with 7 minutes of residence time.

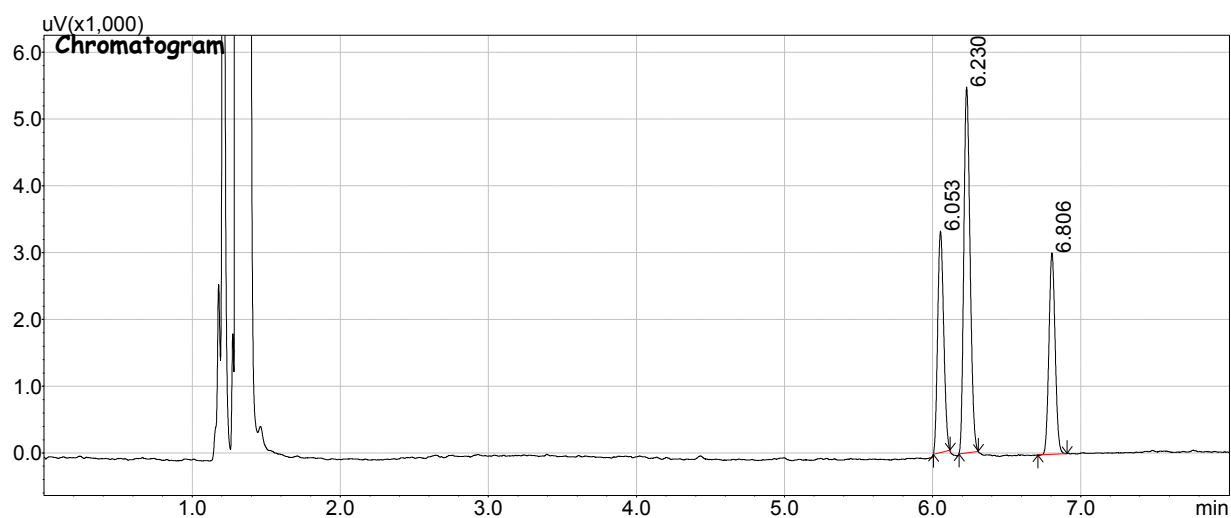

Figure S30: ECR1091F with 15 minutes of residence time.

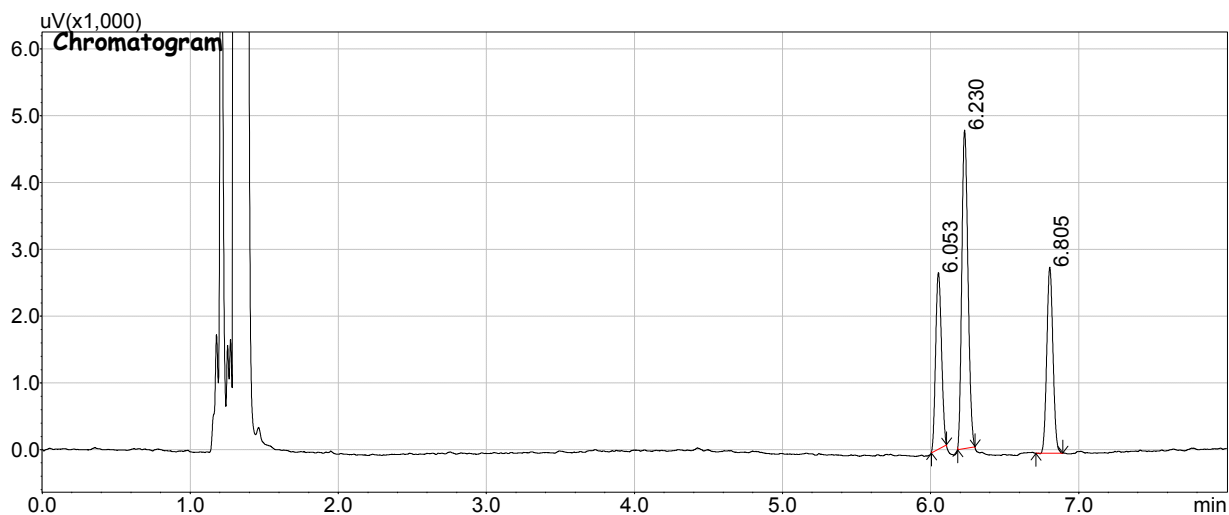

Figure S31: ECR1091F with 20 minutes of residence time

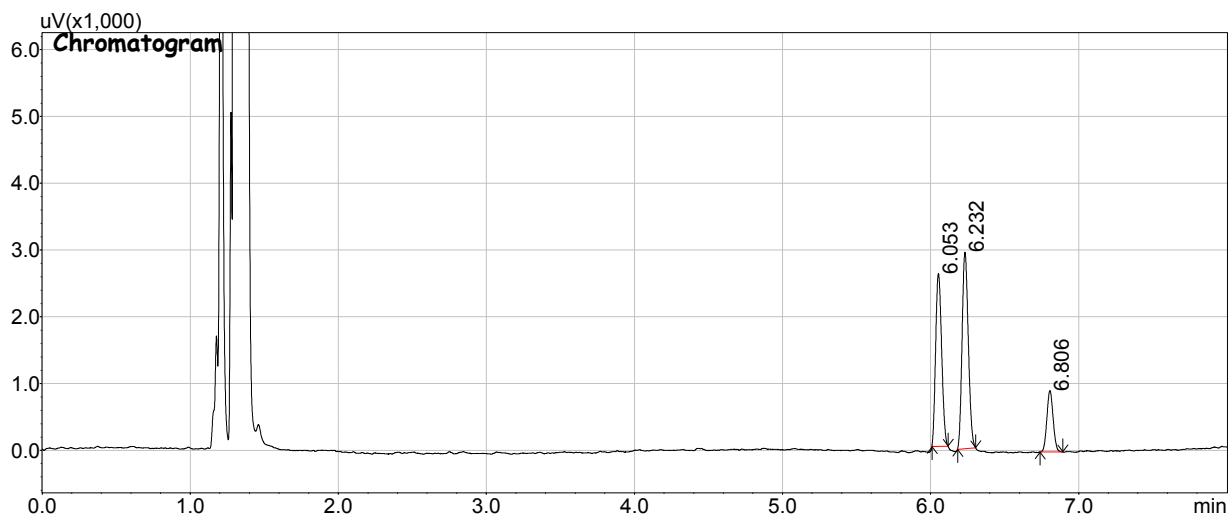

Figure S32: ECR8806F with 7 minutes of residence time.

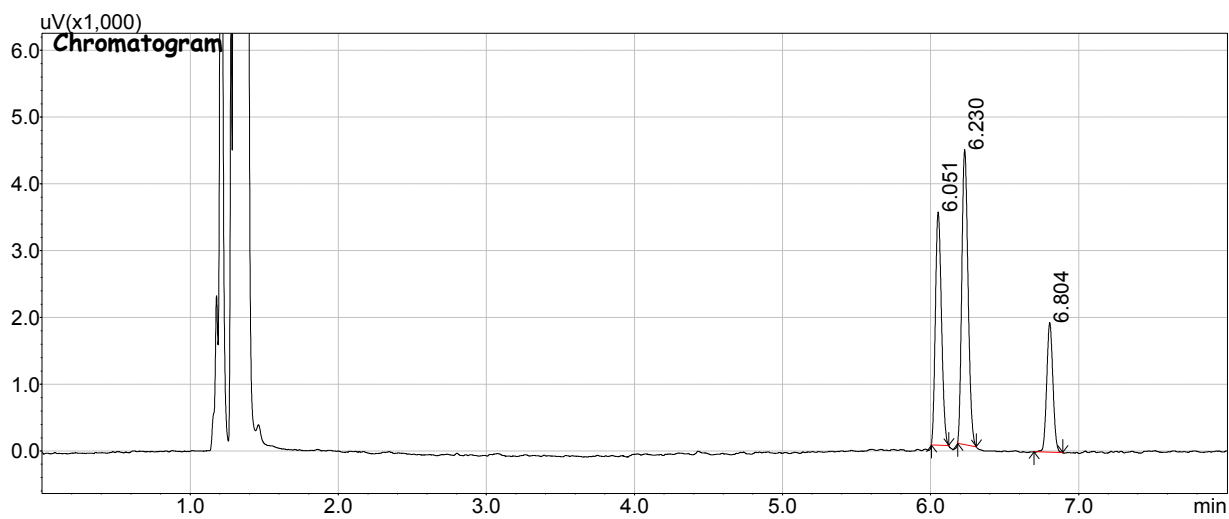

Figure S33: ECR8806F with 15 minutes of residence time.

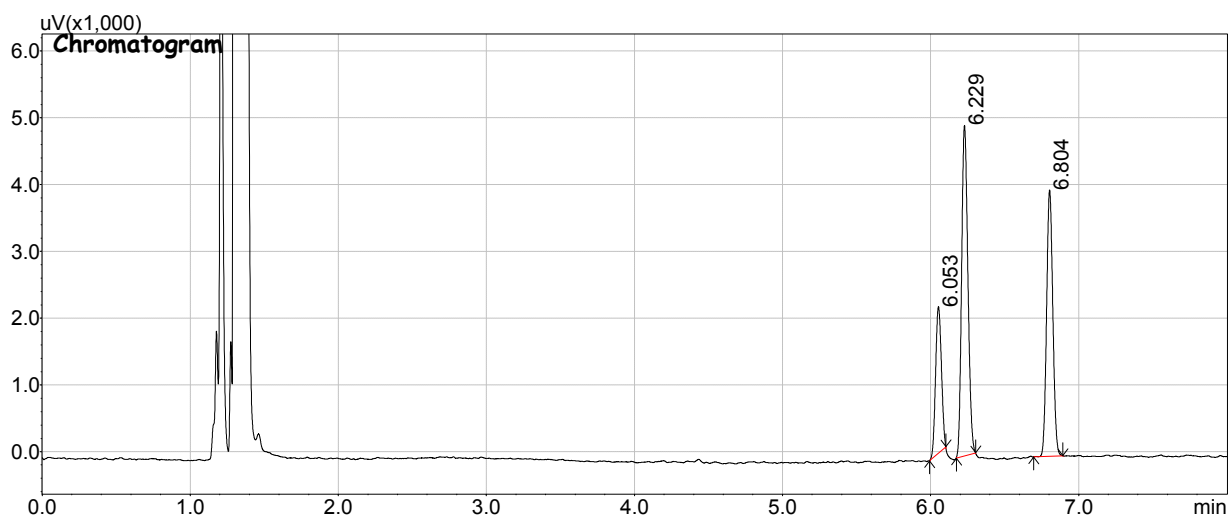

Figure S34: ECR8806F with 20 minutes of residence time.

### 2.1.2 - Chromatogram for Kinetic Resolution using Lipase B from *Candida antarctica* immobilized on Accurel MP-1000 in batch and continuous flow conditions.

- **Batch reactor**

All reactions under batch conditions occurred at 50°C, with 0.33M of 1-phenylethanol, 0.33M of vinyl acetate and 15% of biocatalyst in 3 mL of cyclohexane for 2 hours.

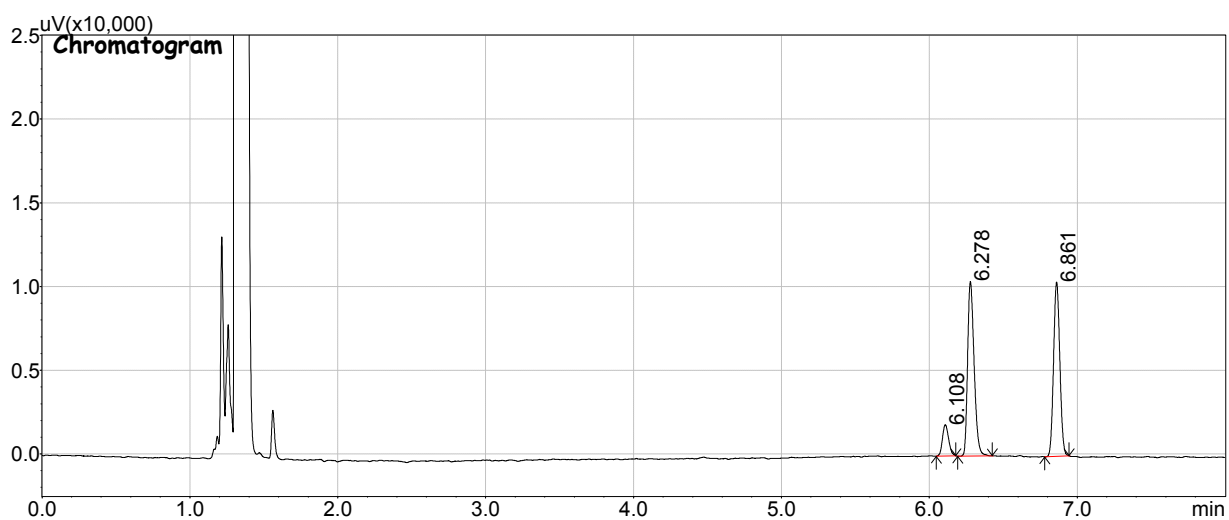

Figure S35: 1° cycle in batch.

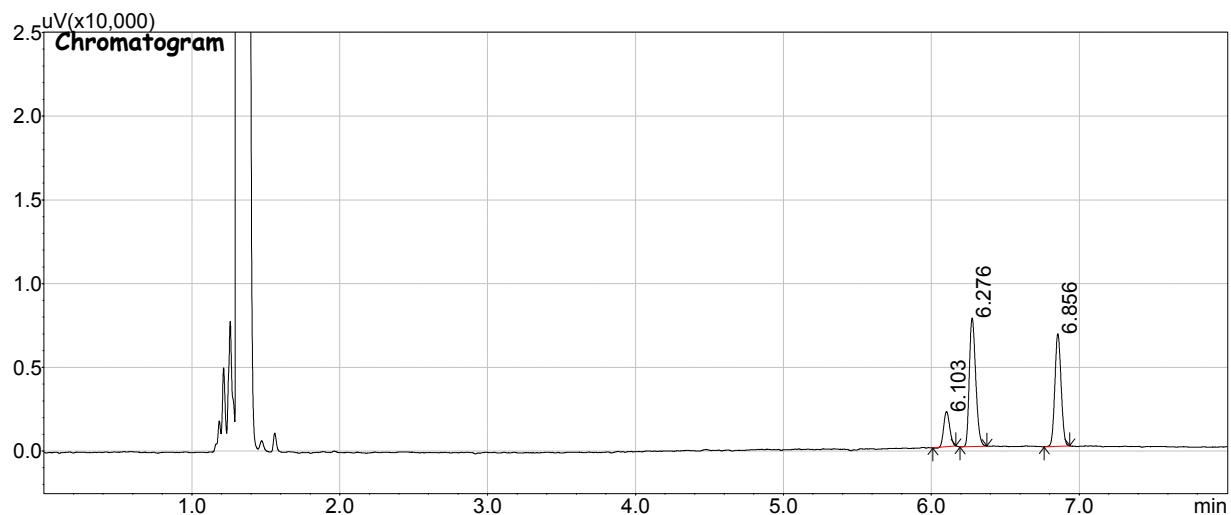

Figure S36: 2° cycle in batch.

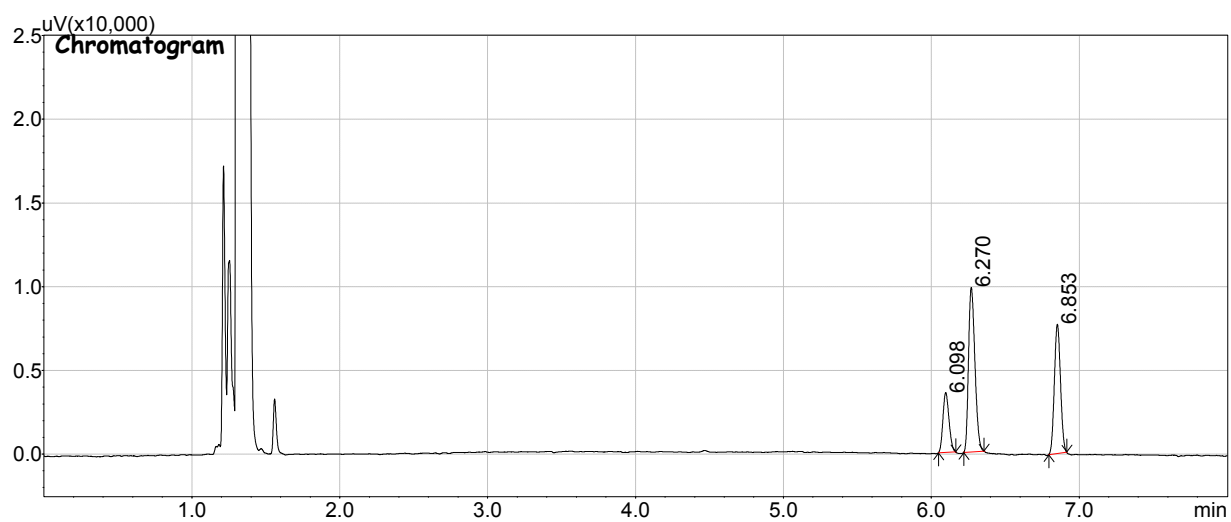

Figure S37: 3° cycle in batch

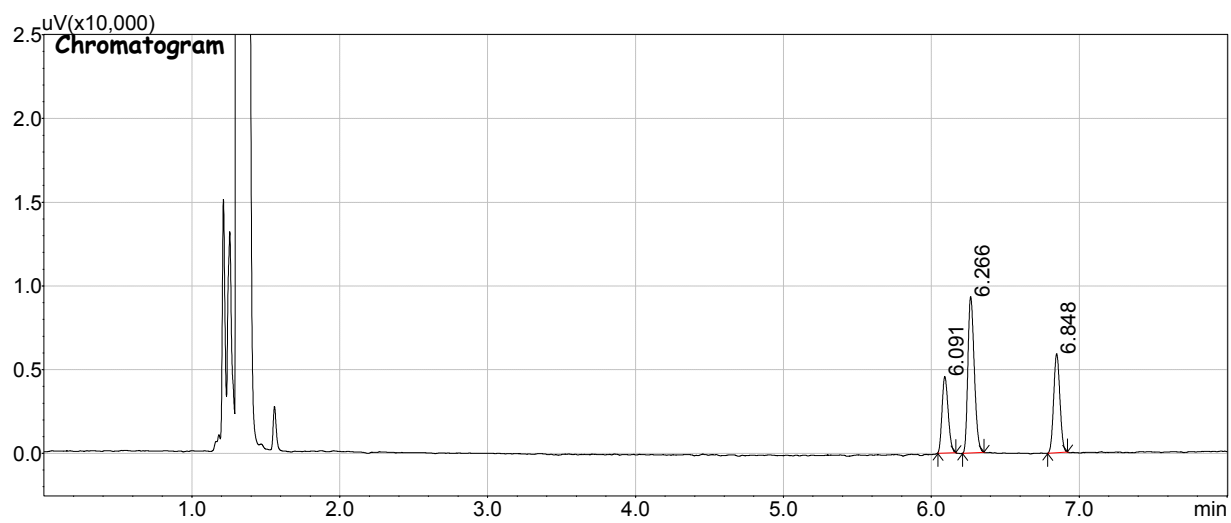

Figure S38: 4° cycle in batch

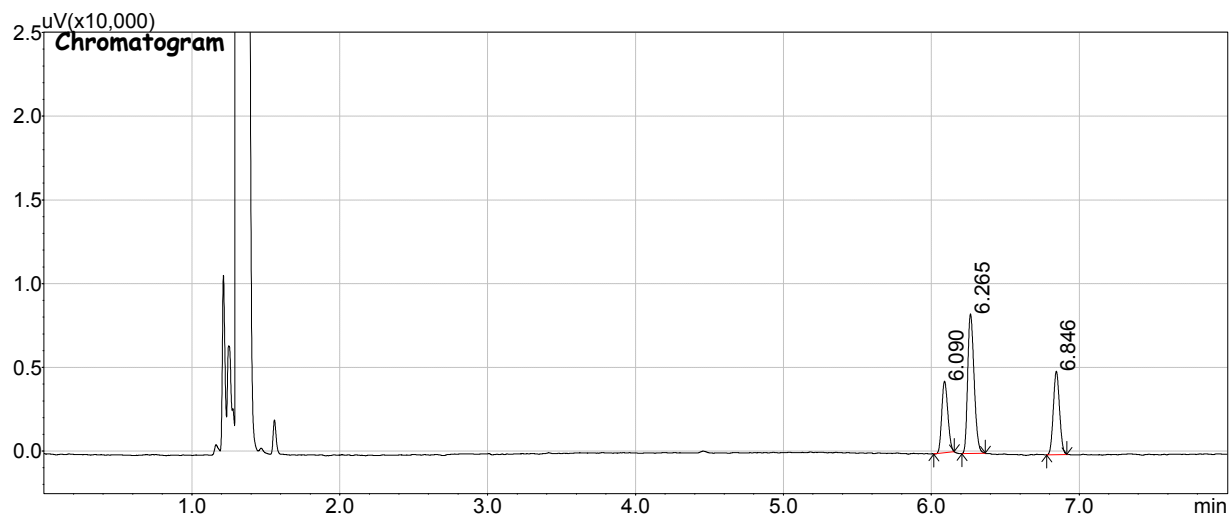

Figure S39: 5<sup>o</sup> cycle in batch

- **Continuous flow reactor**

All reactions under continuous flow conditions occurred 50°C, with 0.33M of 1-phenylethanol, 0.33M of vinyl acetate and 15 minutes of residence time.

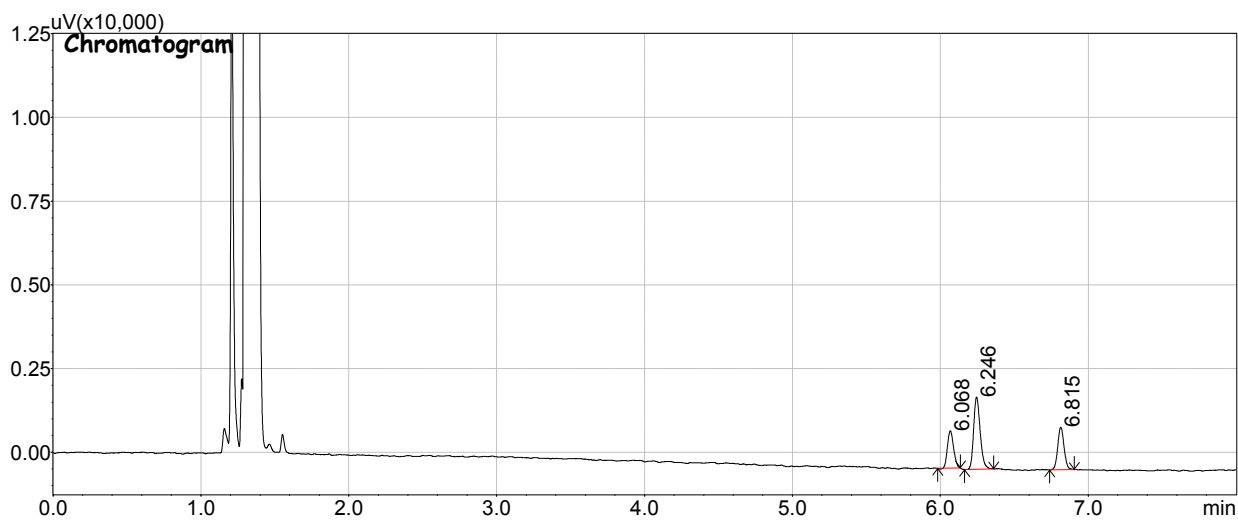

Figure S40: 1<sup>o</sup> cycle in continuous flow

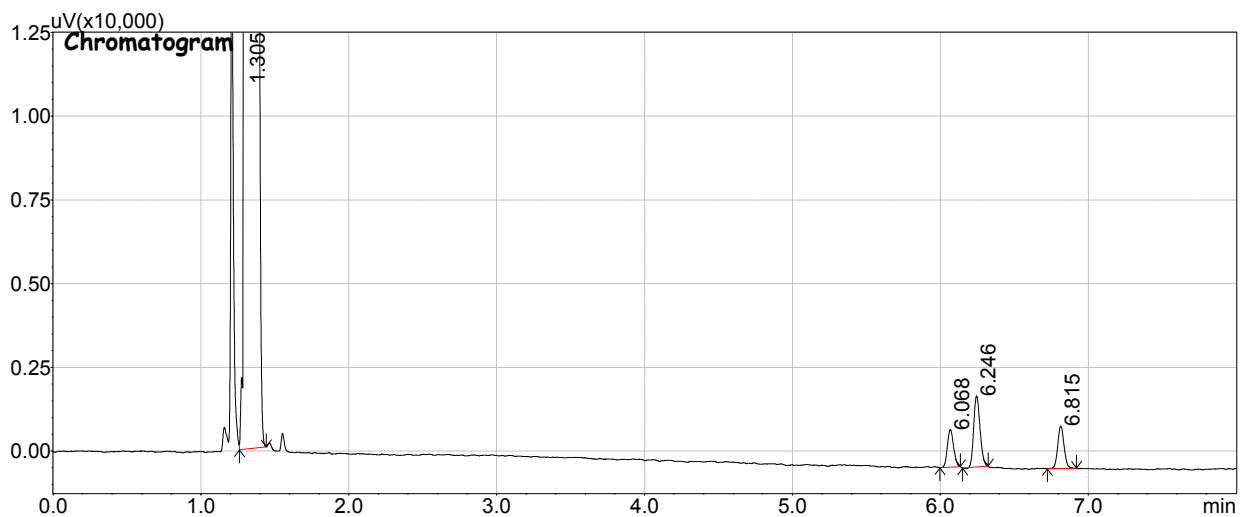

Figure S41: 2° cycle in continuous flow

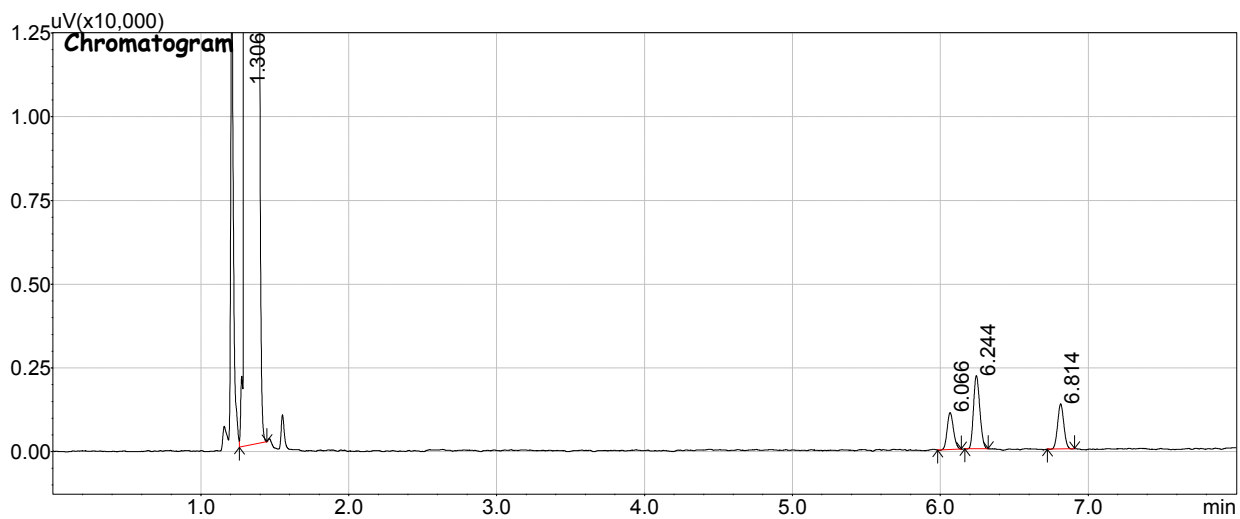

Figure S42: 3° cycle in continuous flow

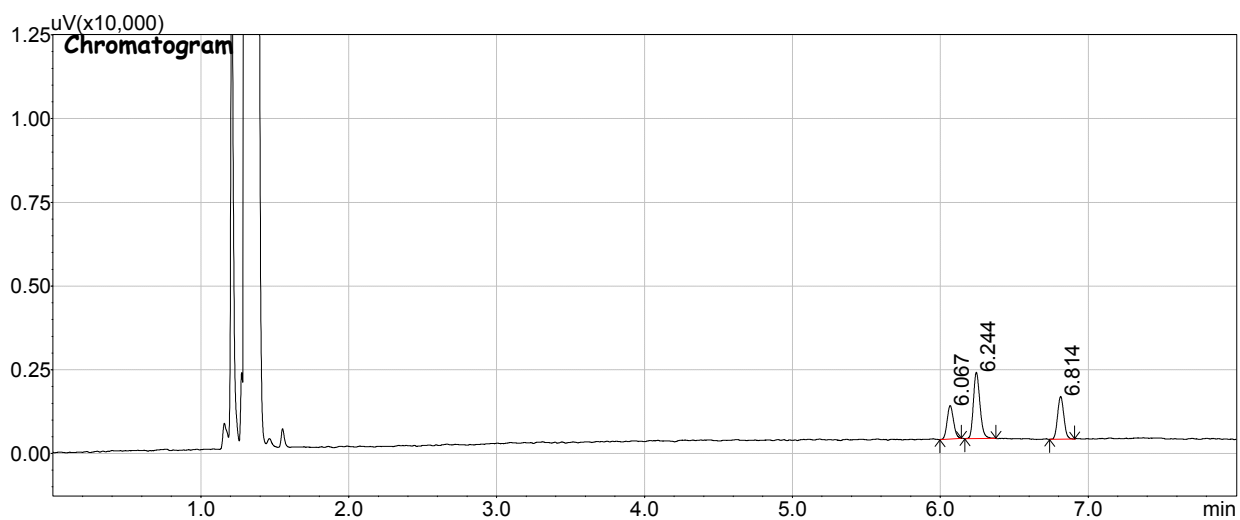

Figure S43: 4° cycle in continuous flow

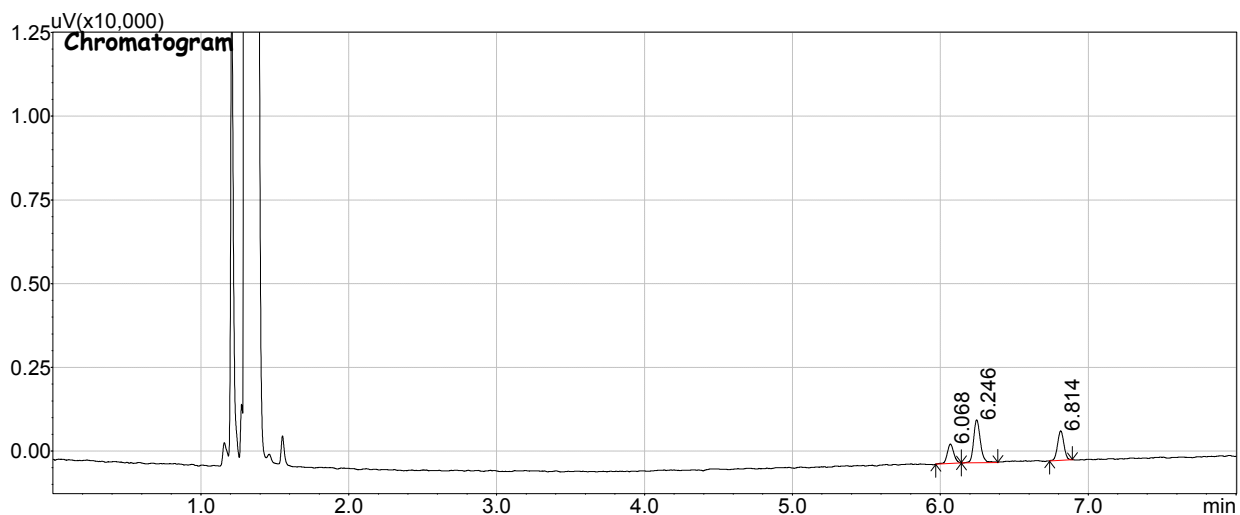

Figure S44: 5° cycle in continuous flow

### 3. Scanning Electronic Microscopy (SEM)

For all samples experimental conditions was: 1mg of sample metallized by gold under vacuum, and analysed in a Zeiss EVO® 50H microscopy

- **Accurel Support**

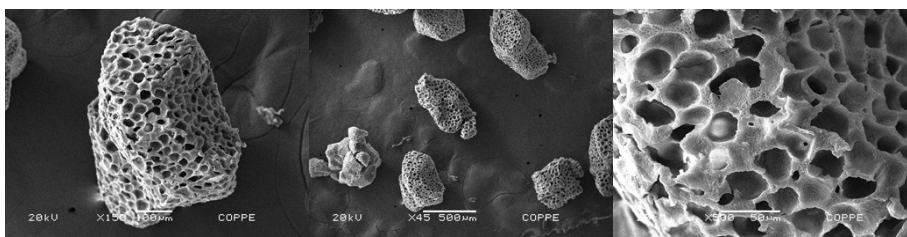

Figura S45 : Accurel Support in amplified x50, x150 e x500

- **Accurel Biocatalyst**

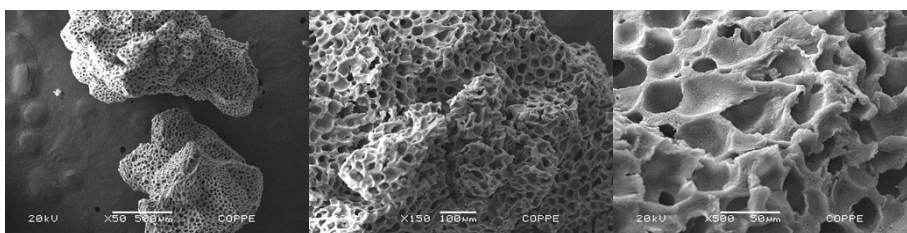

Figura S46 : Accurel Biocatalyst in amplified x50, x150 e x500



- **IB-S861 Support**

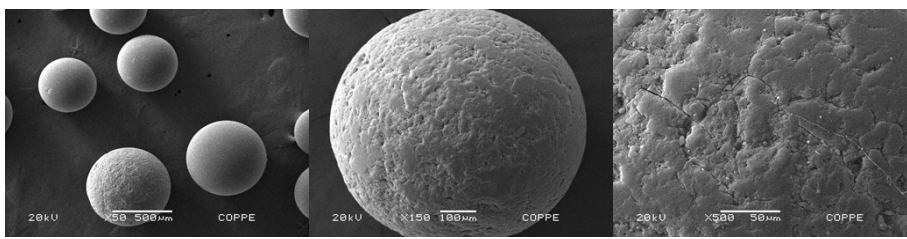

Figura S47 : IB-S861 Support in amplified x50, x150 e x500

- **IB-S861 Biocatalyst**

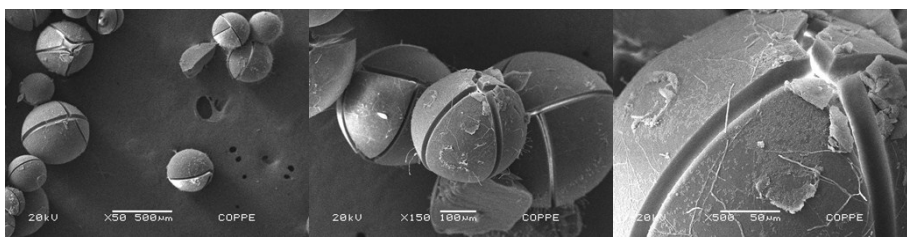

Figura S48 : IB-S861 Biocatalyst in amplified x50, x150 e x500

- **IB-EC1 Support**

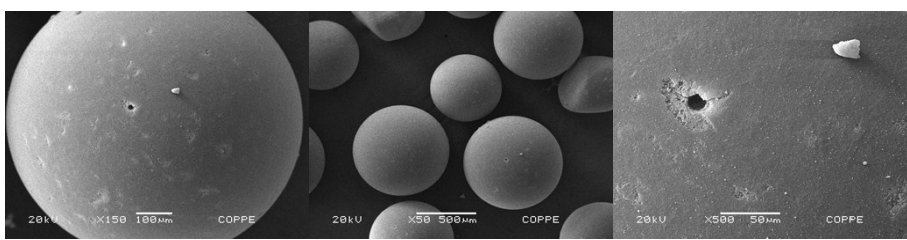

Figura S49 : IB-EC1 Support in amplified x50, x150 e x500

- **IB-EC1 Biocatalyst**

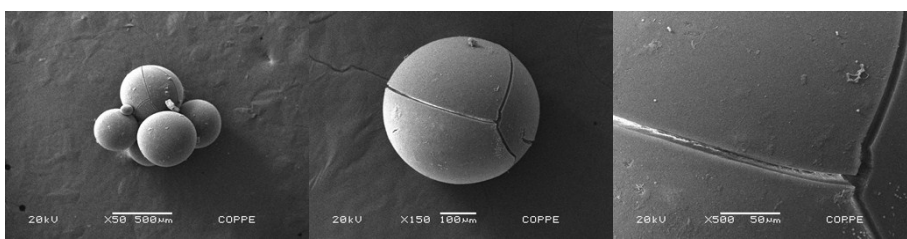

Figura S50 : IB-EC1 Biocatalyst in amplified x50, x150 e x500

- **ECR1091F Support**

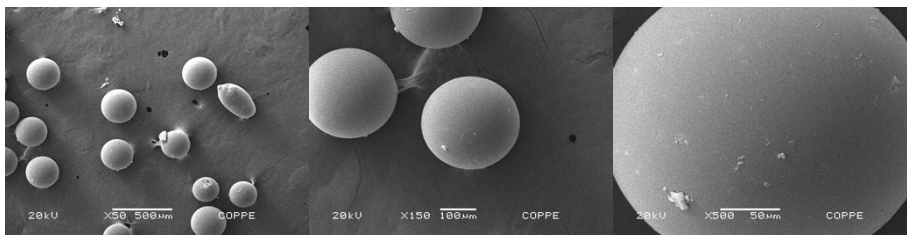

Figura S51 : ECR1091 Support in amplified x50, x150 e x500

- **ECR1091F Biocatalyst**

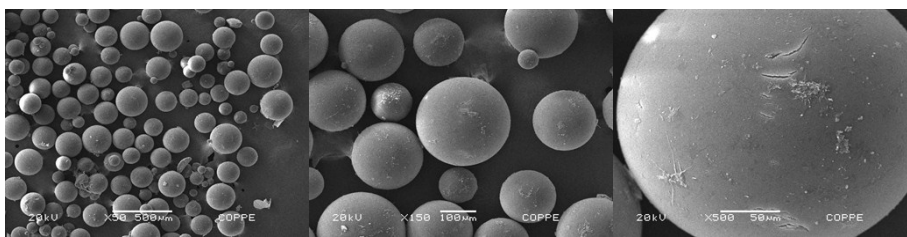

Figura S52 : ECR1091 Biocatalyst in amplified x50, x150 e x500

- **ECR8806F Support**

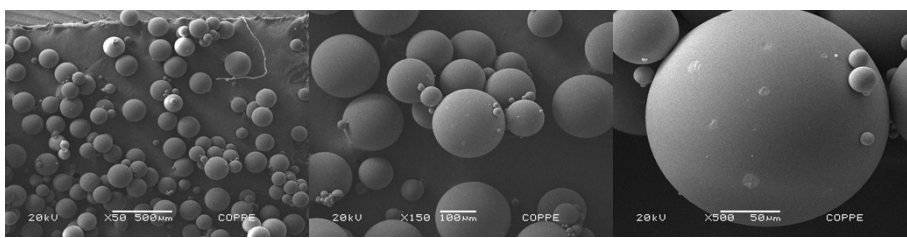

Figura S53 : ECR8806 Support in amplified x50, x150 e x500

- **ECR8806F Biocatalyst**

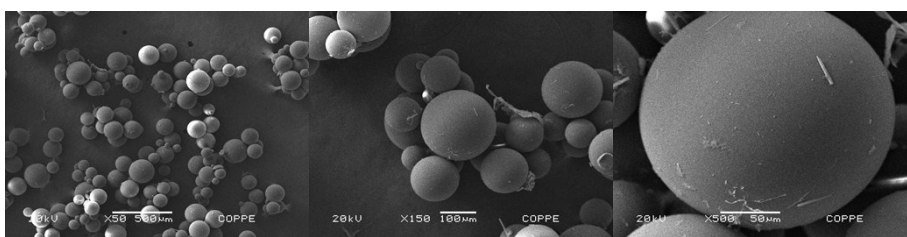

Figura S54 : ECR8806 Biocatalyst in amplified x50, x150 e x500

## 4. IR-RT Spectra

All IR-RT spectra were obtained using the methodologies described in Materials and Methods

- **Support and Biocatalyst of Accurel**

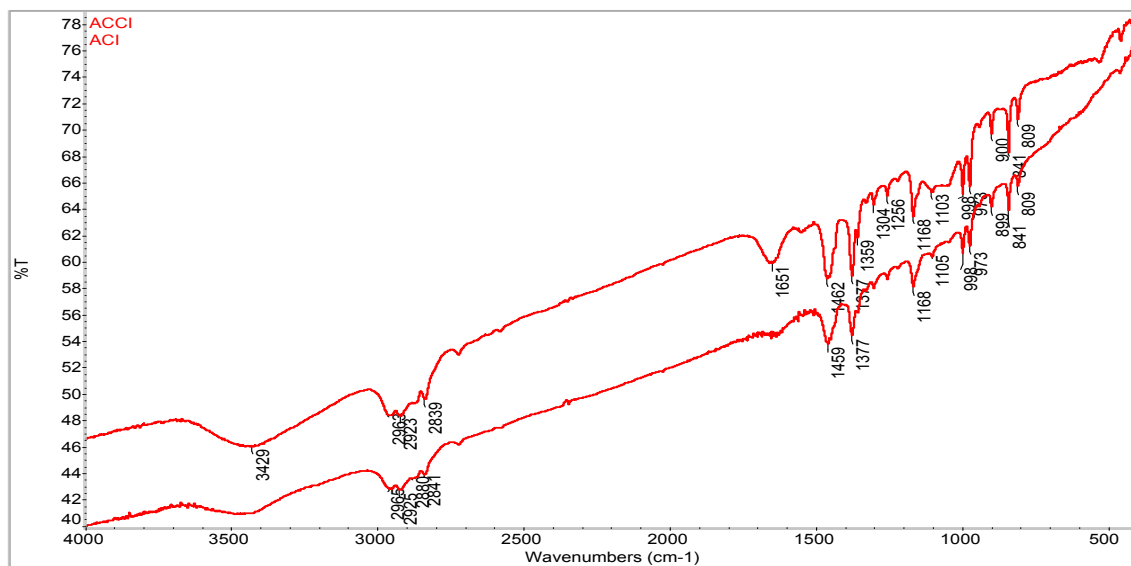

Figura S55: Support Infrared comparison (lower curve) and the biocatalyst (upper curve) of Accurel

- **Support and Biocatalyst of ECR1091F**

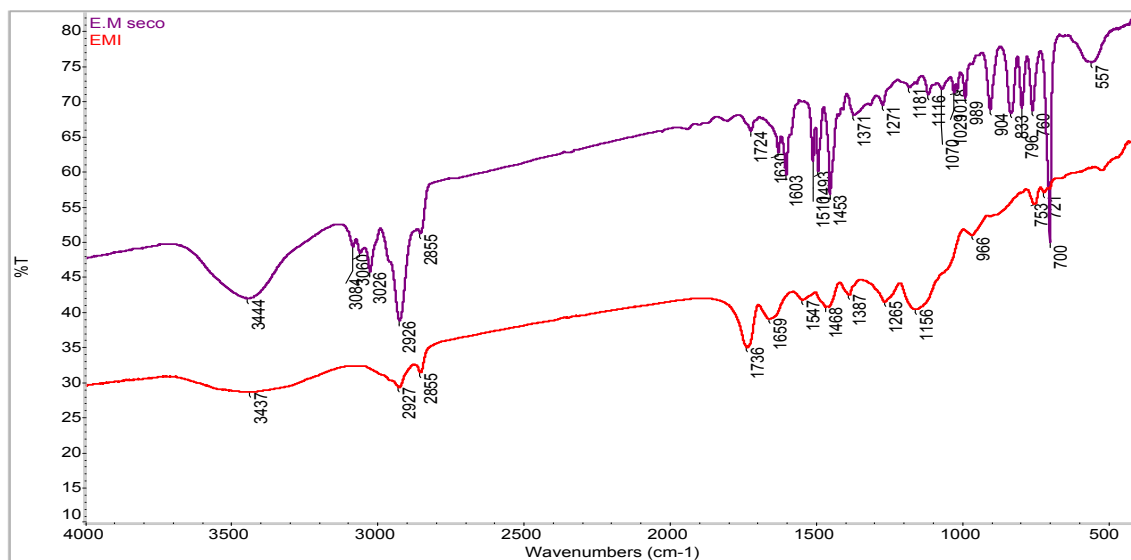

Figura S56: Support Infrared comparison (upper curve) and the biocatalyst (lower curve) of ECR1091F

• **Support and Biocatalyst of ECR8806F**

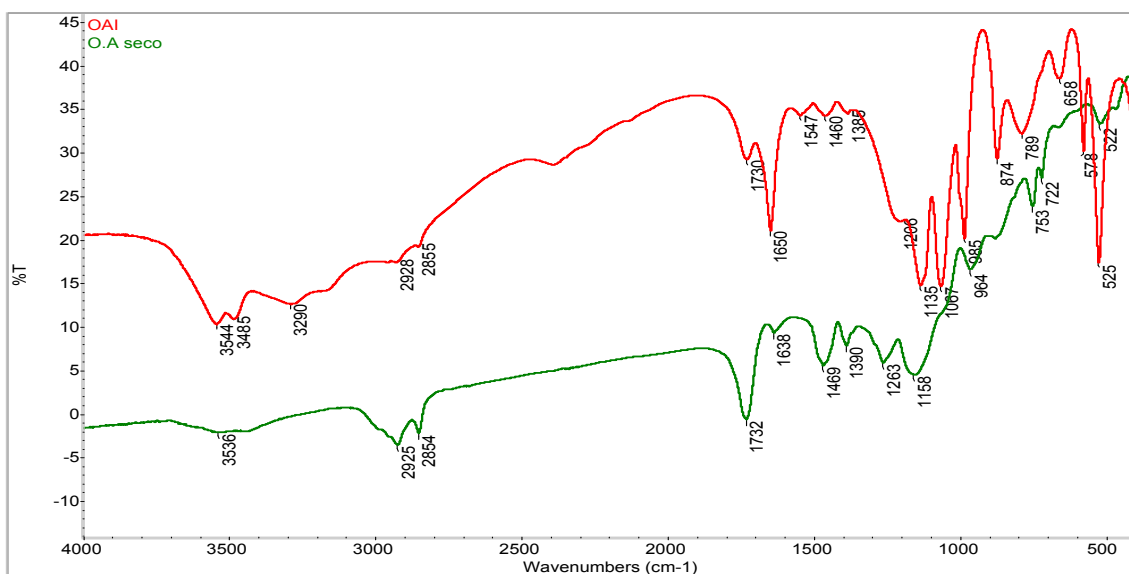

Figura S57: Support Infrared comparison (lower curve) and the biocatalyst (upper curve) ECR8806

• **Support and Biocatalyst of IB-S861**

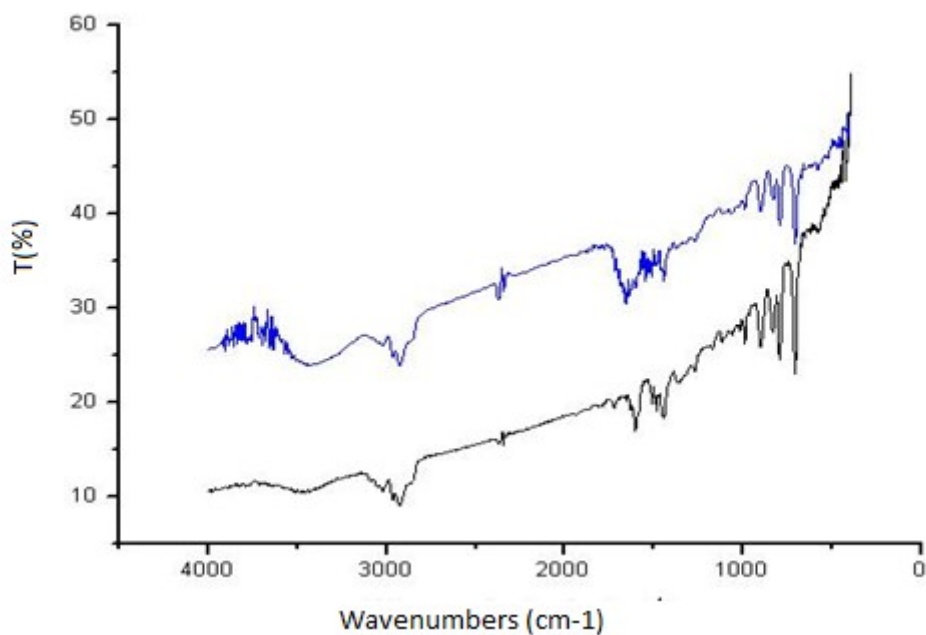

Figura S58: Support Infrared comparison (lower curve) and the biocatalyst (upper curve) of IB-S861

- **Support and Biocatalyst of IB-EC1**

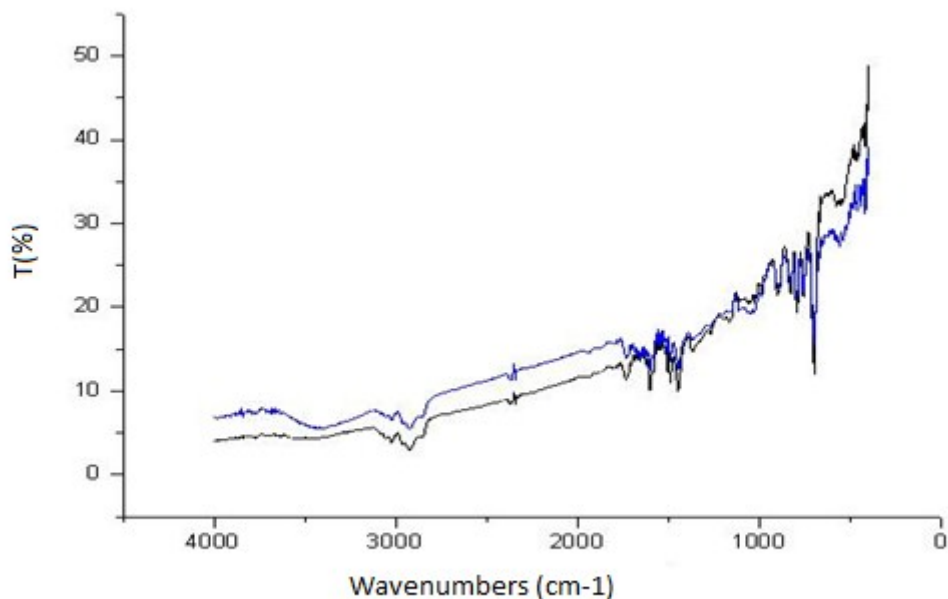

Figura S59: Support Infrared comparison (lower curve) and the biocatalyst (upper curve) of IB-EC1

### 5. Thermo gravimetric analysis

All Thermo gravimetric analysis obtained using the methodologies described in Materials and Methods

- **TG comparison Support/biocatalyst ECR8806F**

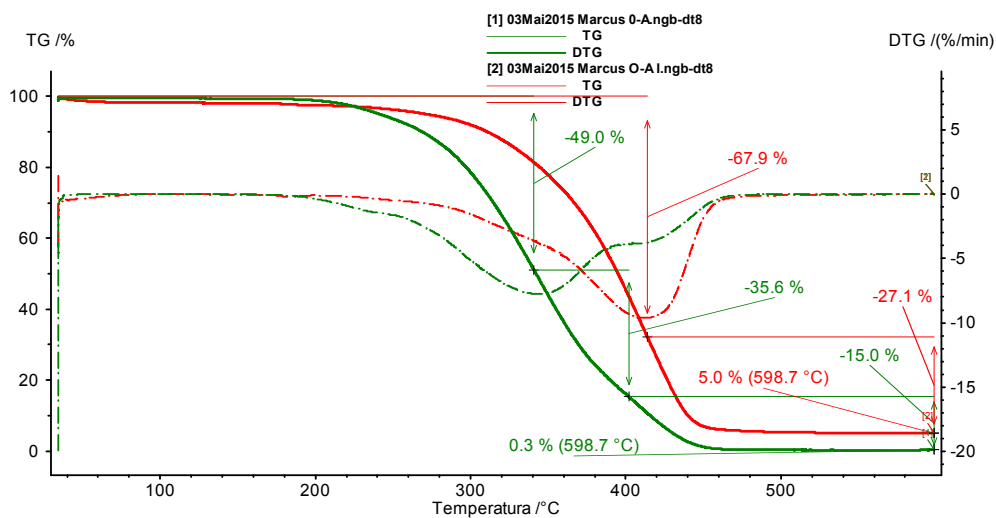

Figura S60: TG spectrum comparison support/biocatalyst ECR8806F

- **TG comparison Support / biocatalyst ECR1091F**

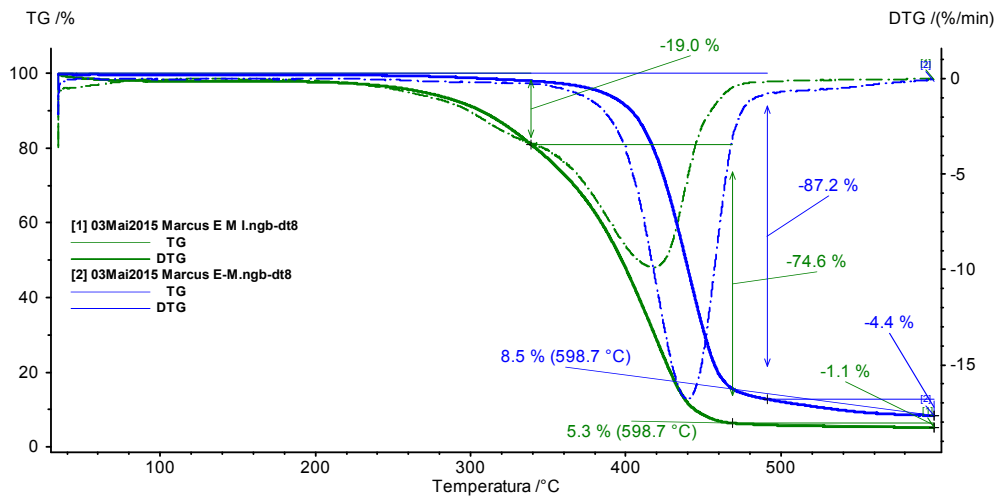

Figura S61: TG spectrum comparison support/biocatalyst ECR1091F

- **TG comparison Support / biocatalyst IB-S861**

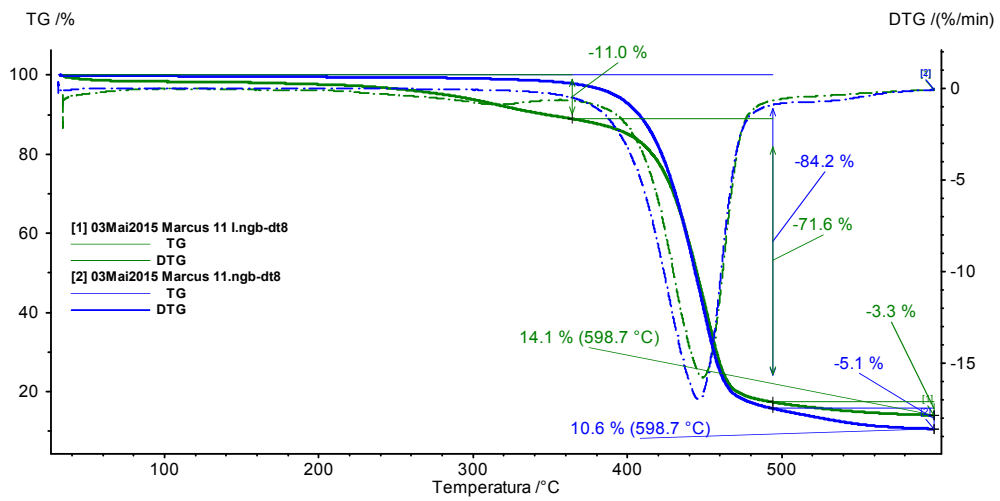

Figura S62: TG spectrum comparison support/biocatalyst IB-S861

- **TG comparison Support / biocatalyst IB-150A**

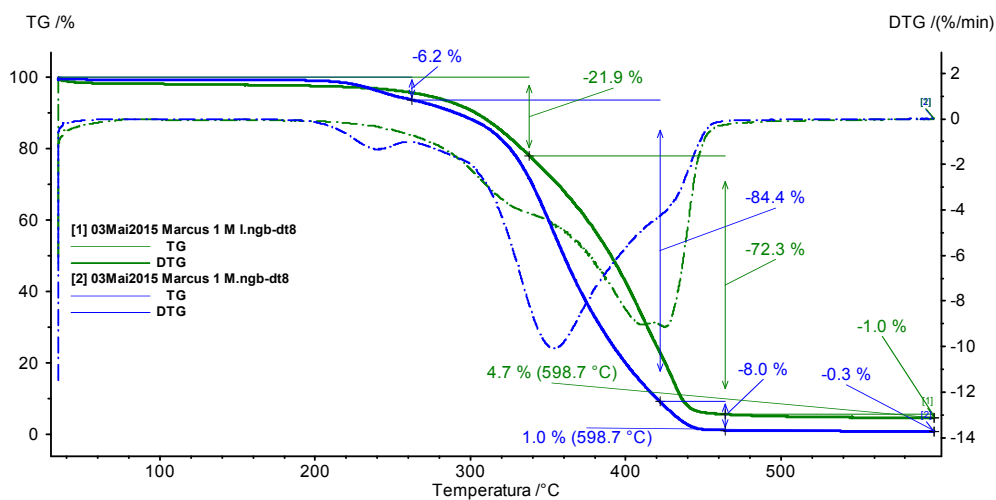

Figura S63: TG spectrum comparison support/biocatalyst IB-150A

- **TG comparison Support / biocatalyst IB-EC1**

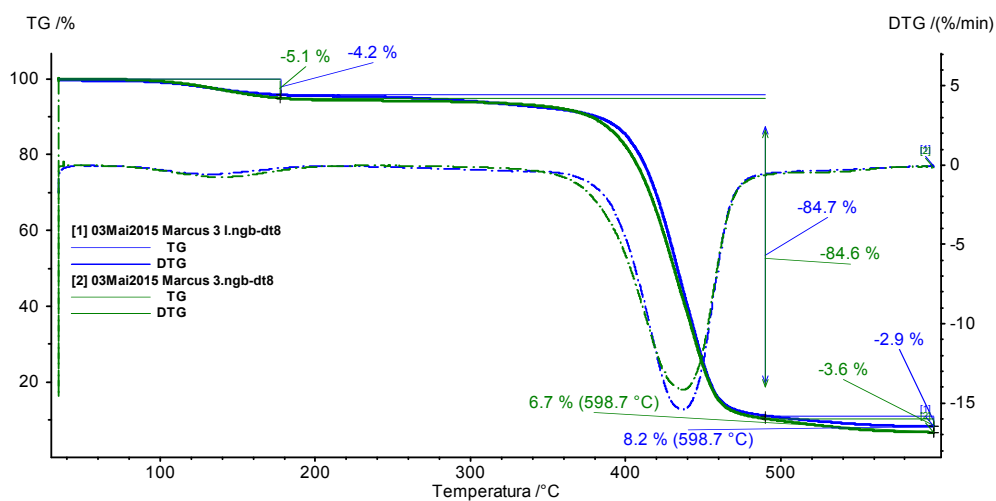

Figura S64: TG spectrum comparison support/biocatalyst IB-EC1

- **TG comparison Support / biocatalyst Accurel**

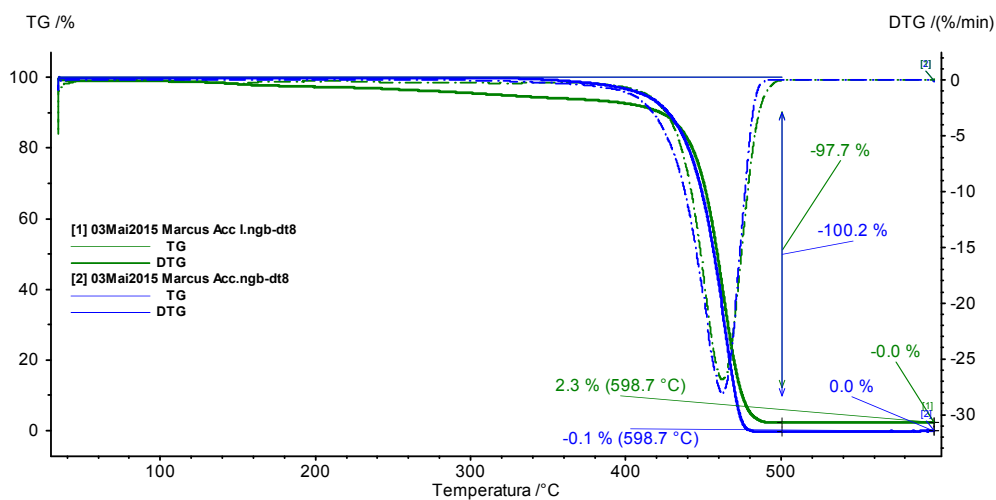

Figura S65: TG spectrum comparison support/biocatalyst Accurel

## 6. Commercial support characteristics

| Support        | Characteristic                                                                                                 |
|----------------|----------------------------------------------------------------------------------------------------------------|
| Accurel MP1000 | Polypropylene, particle size >1500 $\mu$ m                                                                     |
| IB-EC1         | Polyacrylic, carboxylic ester. Water content < 5%                                                              |
| IB-S861        | Polystyrene, aromatic. Water content 35 - 70%                                                                  |
| ECR1091F       | Macroporous styrene, surface area >450m <sup>2</sup> /g, pore diameter 950-1200 (Å), particle size 150-300 mm  |
| ECR8806F       | Octadecyl methacrylate, surface area >50m <sup>2</sup> /g, pore diameter 500-700 (Å), particle size 150-300 mm |
